# Supplementary material for: Investigation of the influence of chirality and halogen atoms on the anticancer activity of enantiopure palladium(ii) complexes derived from chiral amino-alcohol Schiff bases and 2-picolylamine
Source: Royal Society of Chemistry journal article supplement (doi:10.1039/d2nj00321j), 2022-01-01
Supplement: d2nj00321j1.pdf [file d2nj00321j1.pdf]

## **Investigation of the influence of chirality and halogen atoms on the anticancer activity of enantiopure palladium(II) complexes derived from chiral amino-alcohol Schiff bases and 2-picolylamine**

Hadi Amiri Rudbari<sup>a,\*</sup>, Nazanin Kordestani<sup>a</sup>, Jose V. Cuevas-Vicario<sup>b</sup>, Min Zhou<sup>c</sup>, Thomas Efferth<sup>c</sup>, Isabel Correia<sup>d</sup>, Tanja Schirmeister<sup>e</sup>, Fabian Barthels<sup>e</sup>, Mohammed Enamullah<sup>f</sup>, Alexandra R. Fernandes<sup>g</sup>, Nicola Micale<sup>h,\*</sup>

<sup>a</sup> *Department of Chemistry, University of Isfahan, Isfahan 81746-73441, Iran.*

<sup>b</sup> *Department of Chemistry, Universidad de Burgos, Pza. Misael Bañuelos s/n, E-09001 Burgos, Spain.*

<sup>c</sup> *Department of Pharmaceutical Biology, Institute of Pharmaceutical and Biomedical Sciences, Johannes Gutenberg University, Staudinger Weg 5, 55128 Mainz, Germany*

<sup>d</sup> *Centro de Química Estrutural, Departamento de Engenharia Química, Instituto Superior Técnico, Universidade de Lisboa, Av. Rovisco Pais 1, 1049-001 Lisboa, Portugal*

<sup>e</sup> *Department of Medicinal Chemistry, Institute of Pharmaceutical and Biomedical Sciences, Johannes Gutenberg University, Staudinger Weg 5, 55128 Mainz, Germany.*

<sup>f</sup> *Department of Chemistry, Jahangirnagar University, Dhaka 1342, Bangladesh.*

<sup>g</sup> *UCIBIO, Departamento Ciências da Vida, Faculdade de Ciências e Tecnologia, Universidade NOVA de Lisboa, 2829-516 Caparica, Portugal.*

<sup>h</sup> *Department of Chemical, Biological, Pharmaceutical and Environmental Sciences, University of Messina, Viale Ferdinando Stagno D'Alcontres 31, I-98166 Messina, Italy.*

\* Corresponding authors.

E-mail addresses: [h.a.rudbari@sci.ui.ac.ir](mailto:h.a.rudbari@sci.ui.ac.ir); [hamiri1358@gmail.com](mailto:hamiri1358@gmail.com) (H. Amiri Rudbari), [nmicale@unime.it](mailto:nmicale@unime.it) (Nicola Micale)

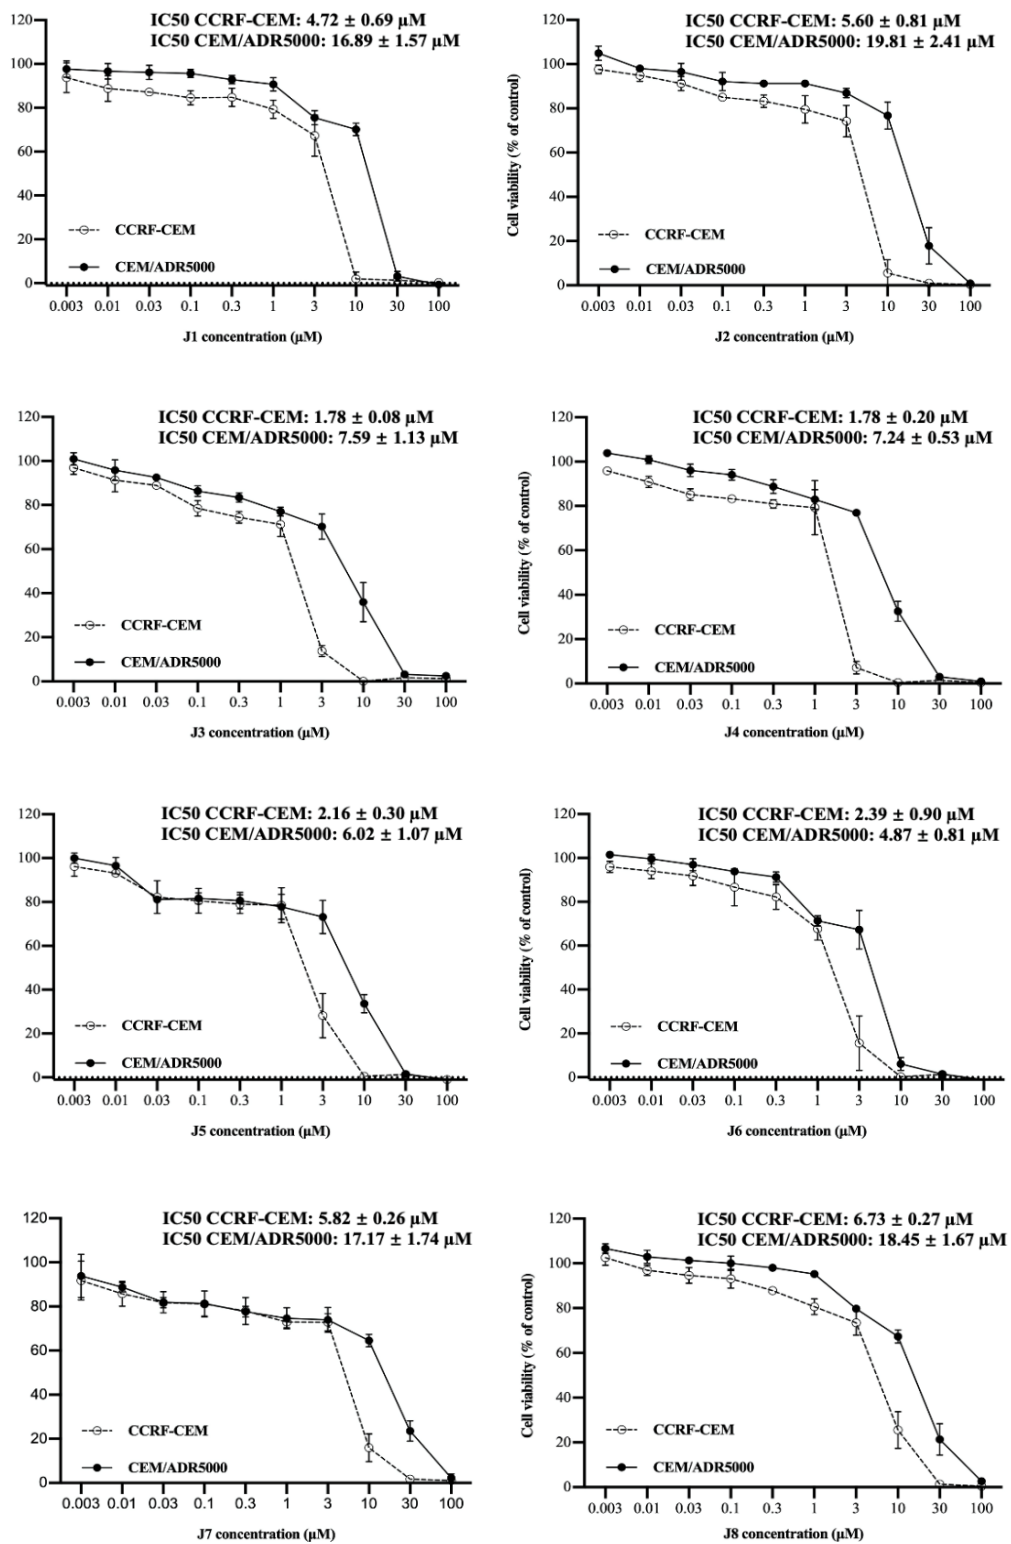

**Fig. S1.** Concentration-response curves of compounds J1-J8 and doxorubicin (positive control) towards CCRF-CEM and CEM/ADR5000 cells. Resazurin assays were performed three times at 37 °C for 72 h.

**Table S1:** CCRF-CEM cell cycle distribution (%) after 24, 48 and 72 h treatment of the compound **J4** at concentrations of  $0.5 \cdot IC_{50}$ ,  $IC_{50}$ ,  $2 \cdot IC_{50}$ . In **J4** treatment, G2/M phase was also arrested in a concentration-dependent manner.

**J4 24 h**

|         | sub G1 |     | G0/G1 |     | S    |     | G2/M |     |
|---------|--------|-----|-------|-----|------|-----|------|-----|
|         | Mean   | SD  | Mean  | SD  | Mean | SD  | Mean | SD  |
| Control | 0.7    | 0.5 | 50.4  | 4.8 | 30.9 | 0.3 | 17.9 | 5.4 |
| 0.5IC50 | 1.0    | 0.4 | 46.1  | 5.5 | 33.1 | 1.8 | 19.7 | 6.6 |
| IC50    | 1.     | 0.7 | 47.8  | 5.3 | 30.6 | 3.2 | 19.9 | 6.6 |
| 2IC50   | 5.6    | 3.0 | 38.0  | 3.7 | 32.0 | 2.2 | 24.4 | 6.6 |

**J4 48 h**

|         | sub G1 |     | G0/G1 |     | S    |     | G2/M |     |
|---------|--------|-----|-------|-----|------|-----|------|-----|
|         | Mean   | SD  | Mean  | SD  | Mean | SD  | Mean | SD  |
| control | 1.0    | 0.2 | 46.6  | 4.9 | 36.4 | 6.3 | 15.5 | 1.7 |
| 0.5IC50 | 2.33   | 1.8 | 50.3  | 6.5 | 30.2 | 7.3 | 17.2 | 2.4 |
| IC50    | 1.4    | 0.0 | 49.6  | 2.6 | 27.8 | 0.3 | 21.2 | 2.3 |
| 2IC50   | 5.8    | 1.6 | 34.5  | 2.7 | 30.5 | 4.2 | 29.0 | 3.1 |

**J4 72 h**

|         | sub G1 |     | G0/G1 |     | S    |     | G2/M |     |
|---------|--------|-----|-------|-----|------|-----|------|-----|
|         | Mean   | SD  | Mean  | SD  | Mean | SD  | Mean | SD  |
| control | 3.1    | 2.8 | 43.5  | 1.2 | 35.4 | 4.1 | 18.0 | 3.9 |
| 0.5IC50 | 5.9    | 6.3 | 41.6  | 2.3 | 36.9 | 3.2 | 15.6 | 4.4 |
| IC50    | 4.7    | 3.1 | 45.3  | 1.8 | 38.2 | 4.6 | 11.7 | 2.5 |
| 2IC50   | 5.0    | 2.5 | 34.7  | 8.4 | 36.2 | 4.2 | 24.0 | 5.5 |

**Table S2:** CCRF-CEM cell cycle distribution (%) after 24 , 48 and 72 h treatment of the compound **J6** at concentrations of  $0.5 \cdot IC_{50}$ ,  $IC_{50}$ ,  $2 \cdot IC_{50}$ . In **J6** treatment, G2/M phase was also arrested in a concentration-dependent manner.

**J6 24 h**

|         | sub G1 |     | G0/G1 |      | S    |     | G2/M |     |
|---------|--------|-----|-------|------|------|-----|------|-----|
|         | Mean   | SD  | Mean  | SD   | Mean | SD  | Mean | SD  |
| control | 0.6    | 0.2 | 48.7  | 3.9  | 30.8 | 0.3 | 20.0 | 4.2 |
| 0.5IC50 | 1.3    | 0.4 | 43.9  | 2.9  | 30.5 | 2.4 | 24.2 | 5.5 |
| IC50    | 2.6    | 0.8 | 45.2  | 5.0  | 29.2 | 3.2 | 23.1 | 6.5 |
| 2IC50   | 8.0    | 2.4 | 20.4  | 13.0 | 37.5 | 6.5 | 34.2 | 7.7 |

**J6 48 h**

|         | sub G1 |     | G0/G1 |      | S    |     | G2/M |     |
|---------|--------|-----|-------|------|------|-----|------|-----|
|         | Mean   | SD  | Mean  | SD   | Mean | SD  | Mean | SD  |
| control | 1.4    | 0.3 | 46.9  | 4.0  | 35.3 | 5.4 | 16.4 | 1.9 |
| 0.5IC50 | 1.3    | 0.6 | 41.6  | 7.9  | 36.5 | 6.1 | 20.6 | 5.8 |
| IC50    | 1.3    | 0.7 | 29.1  | 12.9 | 35.9 | 8.7 | 23.4 | 4.3 |
| 2IC50   | 5.1    | 1.2 | 24.7  | 11.4 | 35.9 | 6.2 | 28.6 | 3.0 |

**J6 72 h**

|         | sub G1 |     | G0/G1 |     | S    |     | G2/M |     |
|---------|--------|-----|-------|-----|------|-----|------|-----|
|         | Mean   | SD  | Mean  | SD  | Mean | SD  | Mean | SD  |
| control | 3.1    | 2.8 | 43.5  | 1.2 | 35.4 | 4.1 | 18.0 | 3.9 |
| 0.5IC50 | 3.5    | 1.7 | 40.9  | 3.9 | 37.9 | 3.3 | 17.6 | 3.2 |
| IC50    | 2.4    | 1.2 | 38.2  | 4.8 | 39.7 | 2.7 | 19.9 | 2.7 |
| 2IC50   | 4.8    | 1.8 | 30.6  | 4.3 | 37.2 | 7.7 | 27.4 | 4.9 |

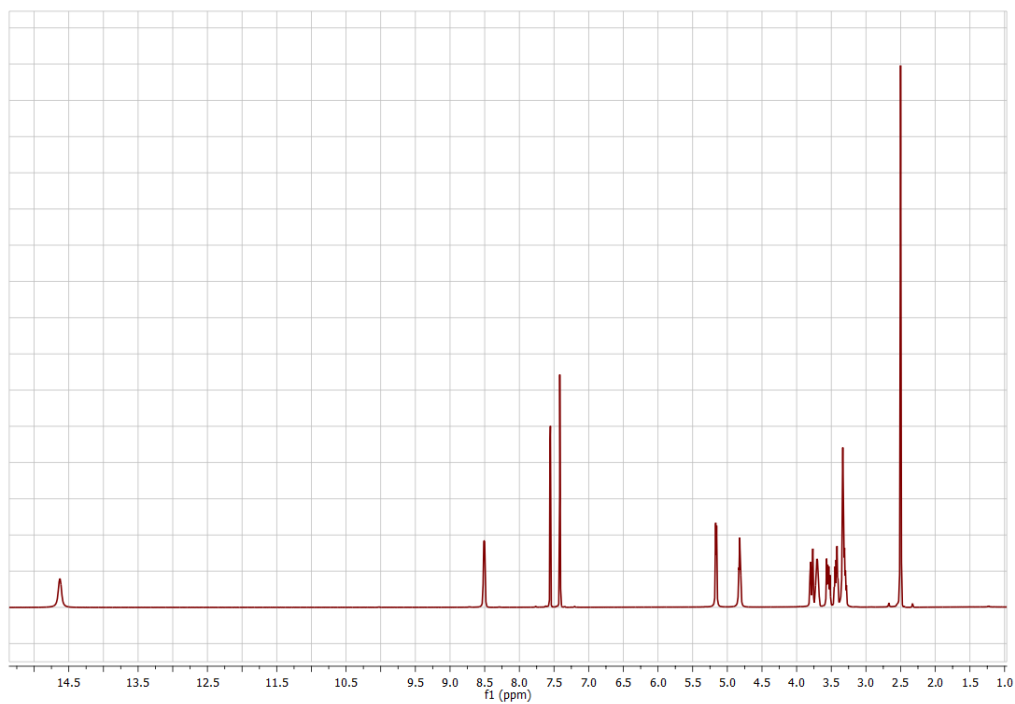

**Fig. S2.**  $^1\text{H}$  NMR spectrum of **HR1** in  $\text{DMSO-}d_6$ .

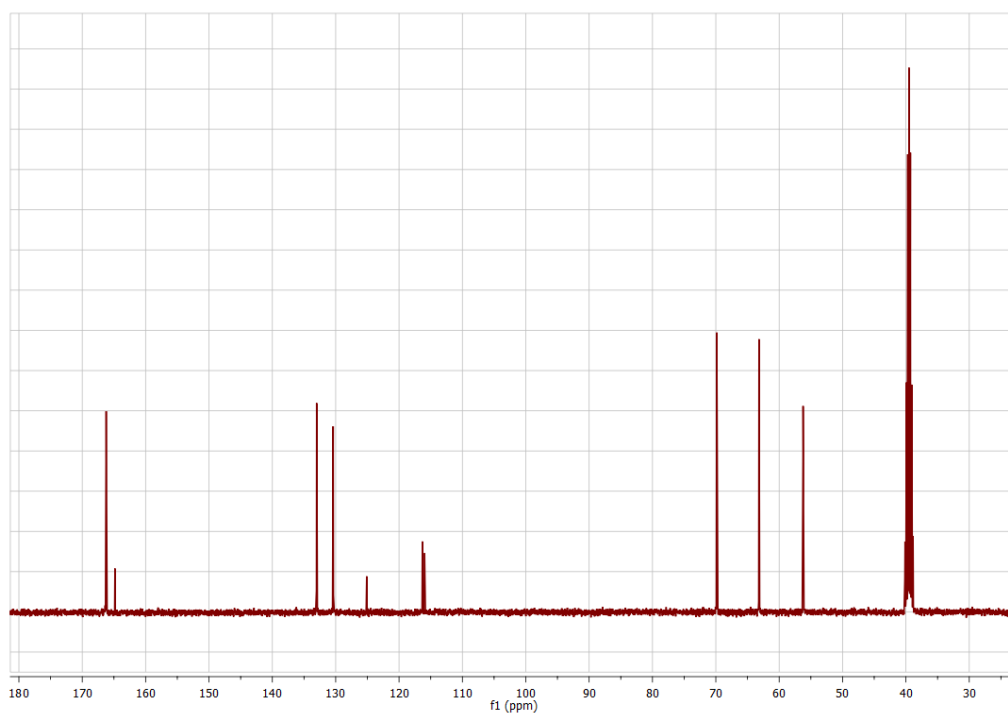

**Fig. S3.**  $^{13}\text{C}$  NMR spectrum of **HR1** in  $\text{DMSO-}d_6$ .

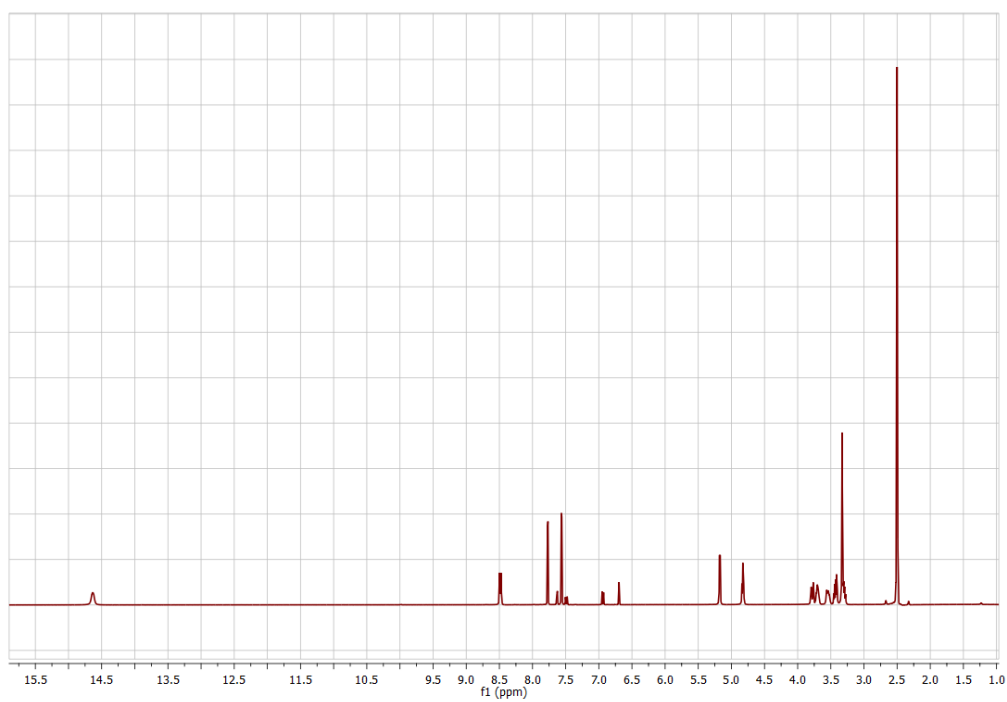

**Fig. S4.**  $^1\text{H}$  NMR spectrum of **HR2** in  $\text{DMSO-}d_6$ .

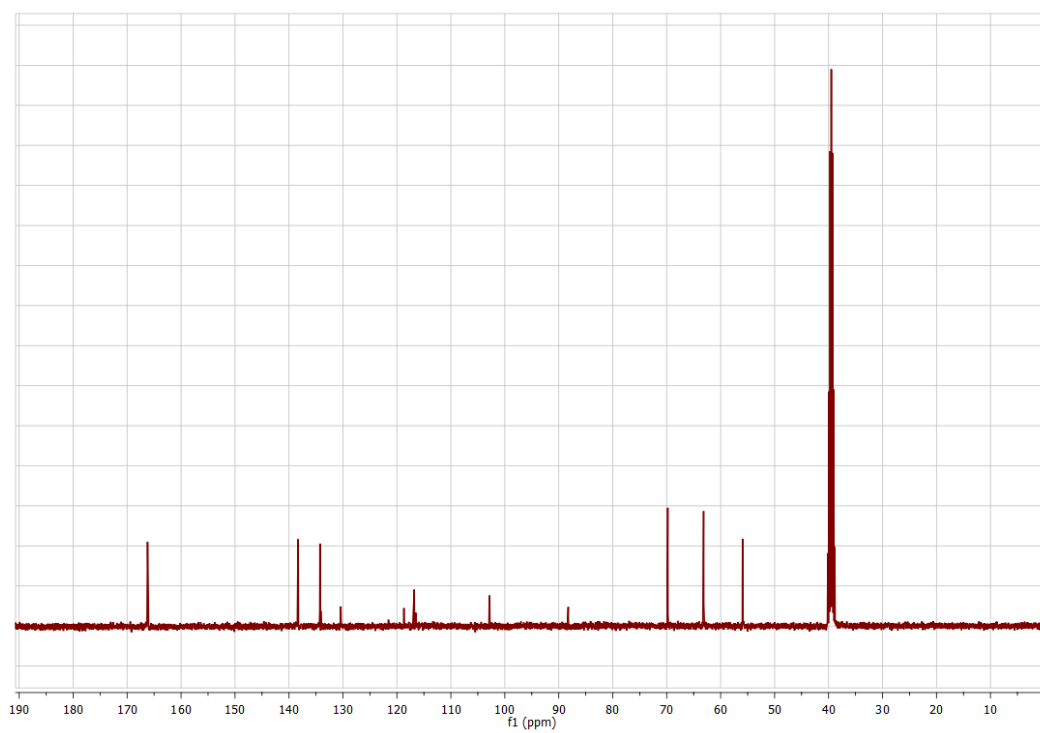

**Fig. S5.**  $^{13}\text{C}$  NMR spectrum of **HR2** in  $\text{DMSO-}d_6$ .

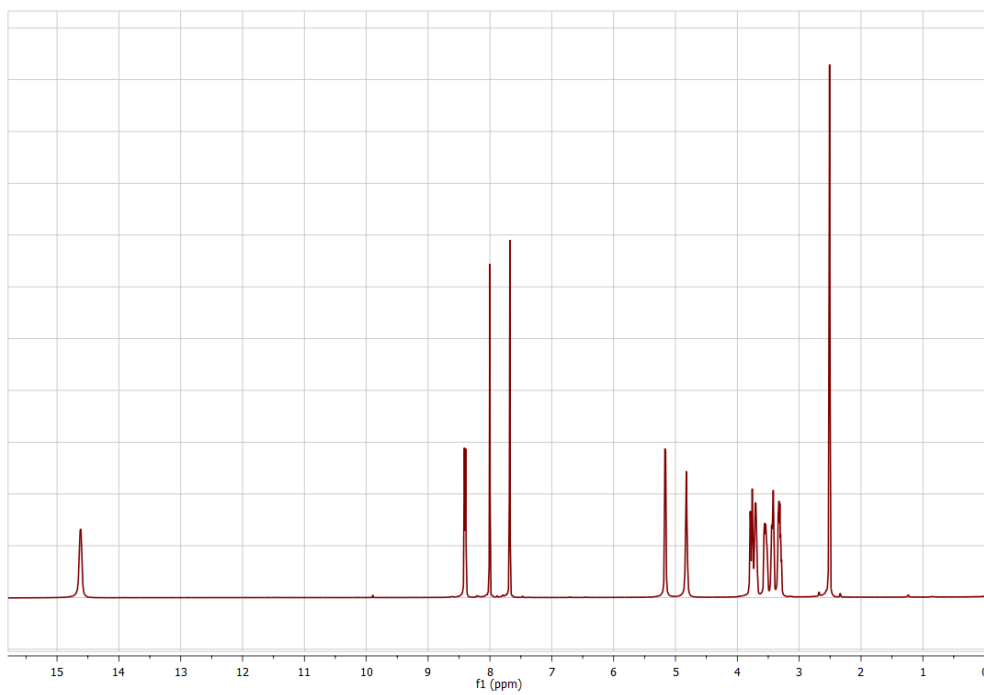

**Fig. S6.**  $^1\text{H}$  NMR spectrum of **HR3** in  $\text{DMSO-}d_6$ .

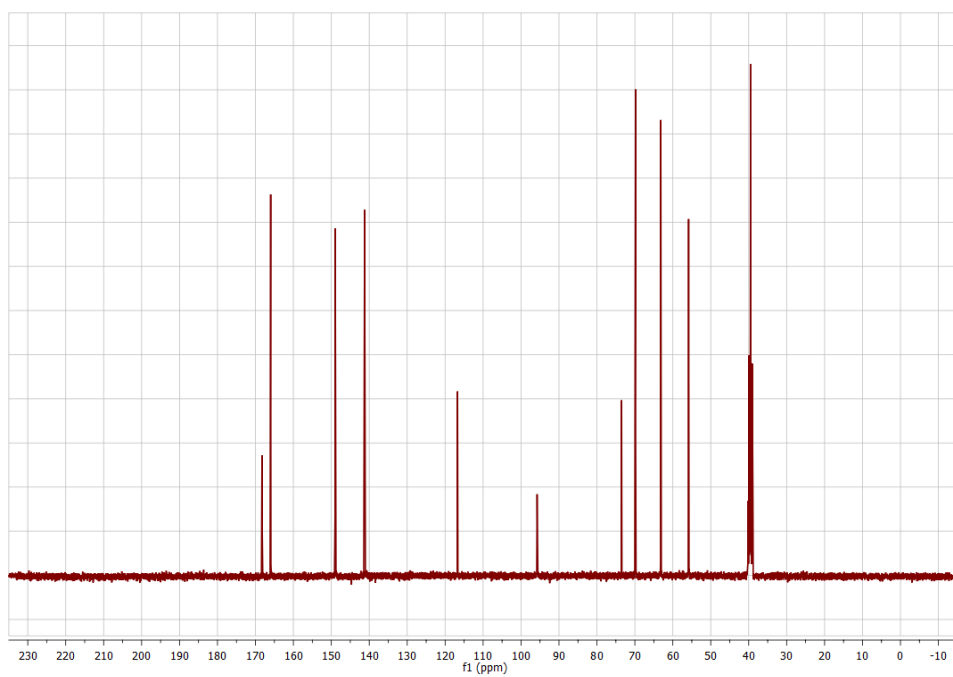

**Fig. S7.**  $^{13}\text{C}$  NMR spectrum of **HR3** in  $\text{DMSO-}d_6$ .

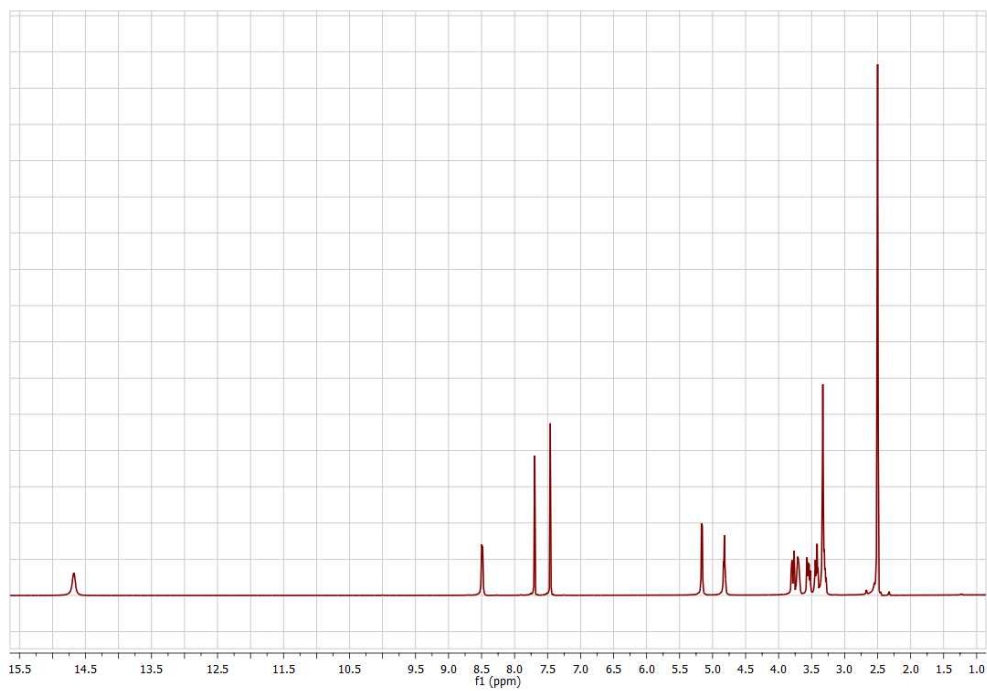

**Fig. S8.**  $^1\text{H}$  NMR spectrum of **HR4** in  $\text{DMSO-}d_6$ .

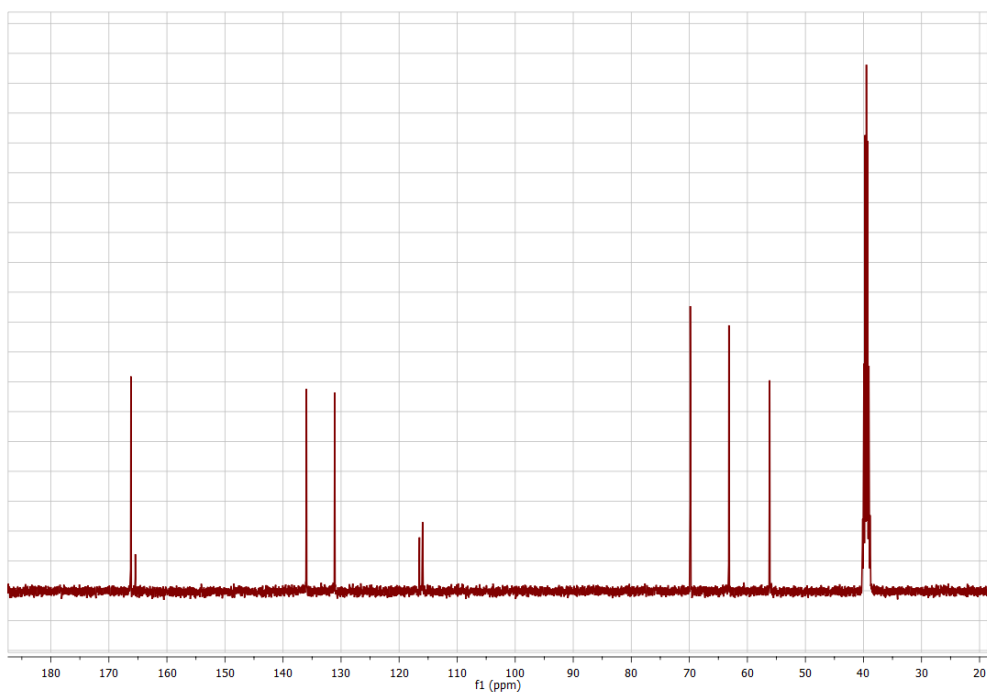

**Fig. S9.**  $^{13}\text{C}$  NMR spectrum of **HR4** in  $\text{DMSO-}d_6$ .



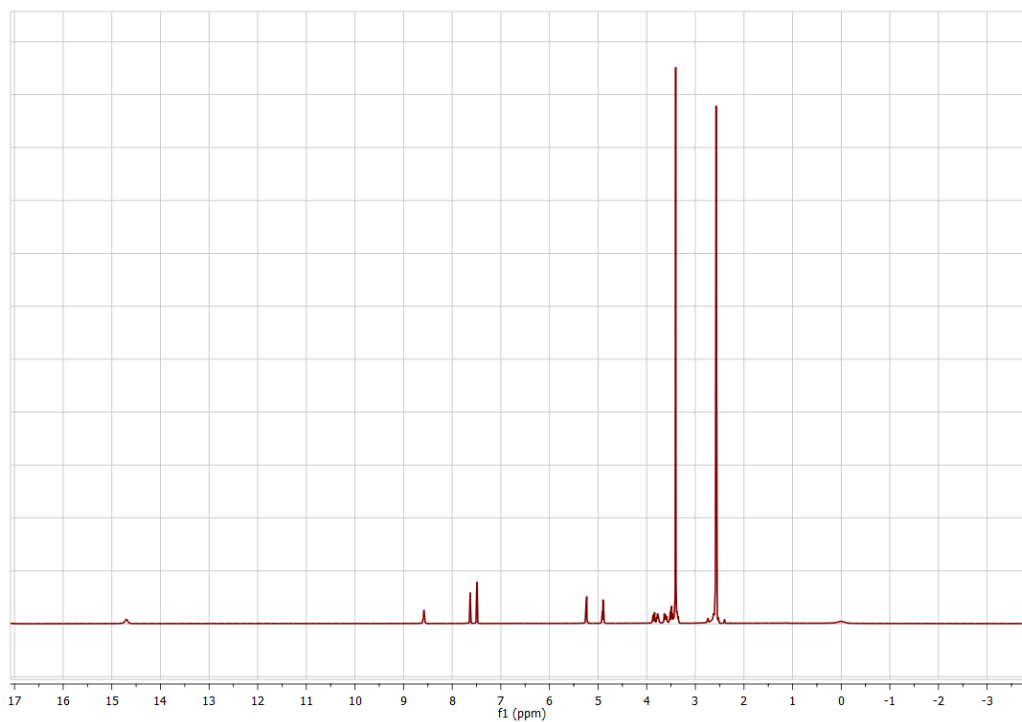

**Fig. S10.**  $^1\text{H}$  NMR spectrum of **HS1** in  $\text{DMSO-}d_6$ .

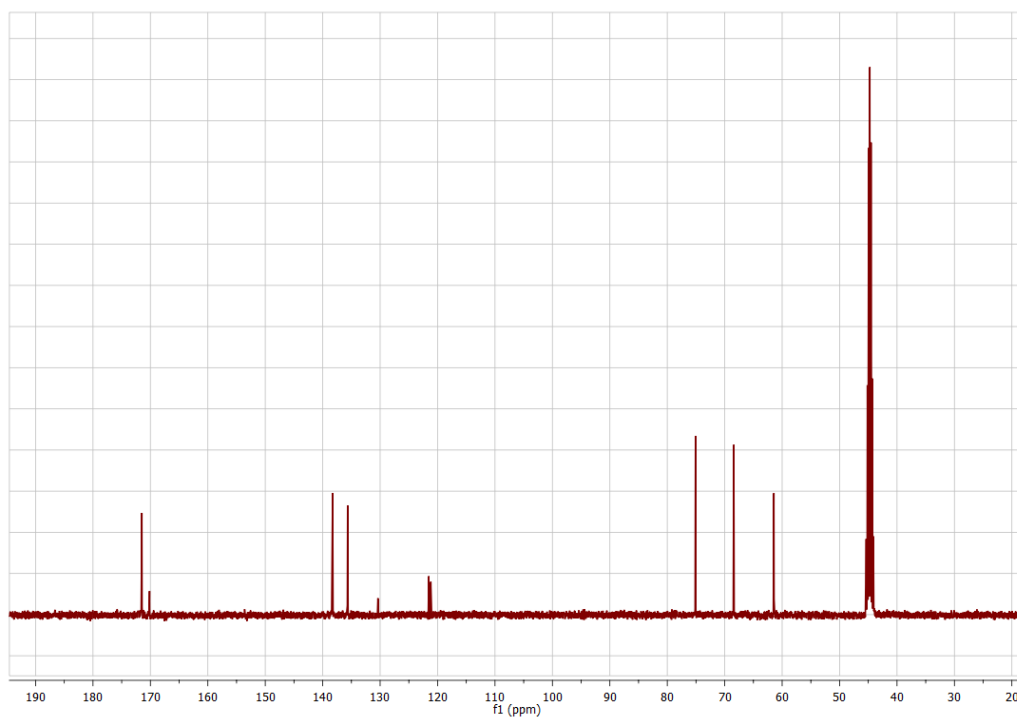

**Fig. S11.**  $^{13}\text{C}$  NMR spectrum of **HS2** in  $\text{DMSO-}d_6$ .

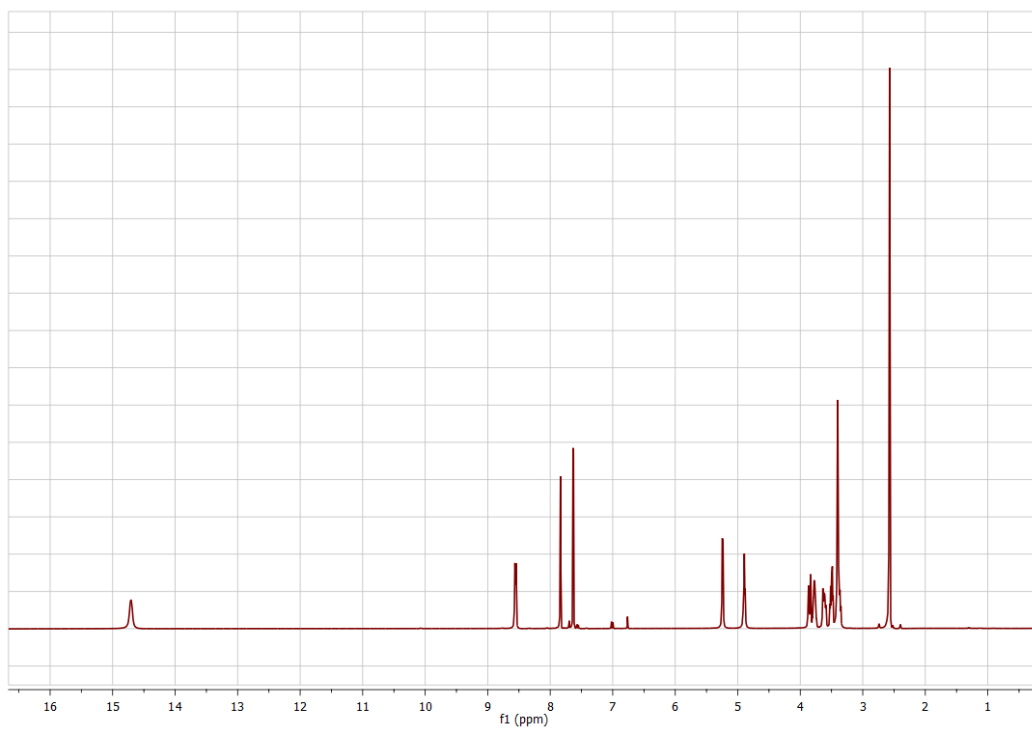

**Fig. S12.**  $^1\text{H}$  NMR spectrum of **HS2** in  $\text{DMSO-}d_6$ .

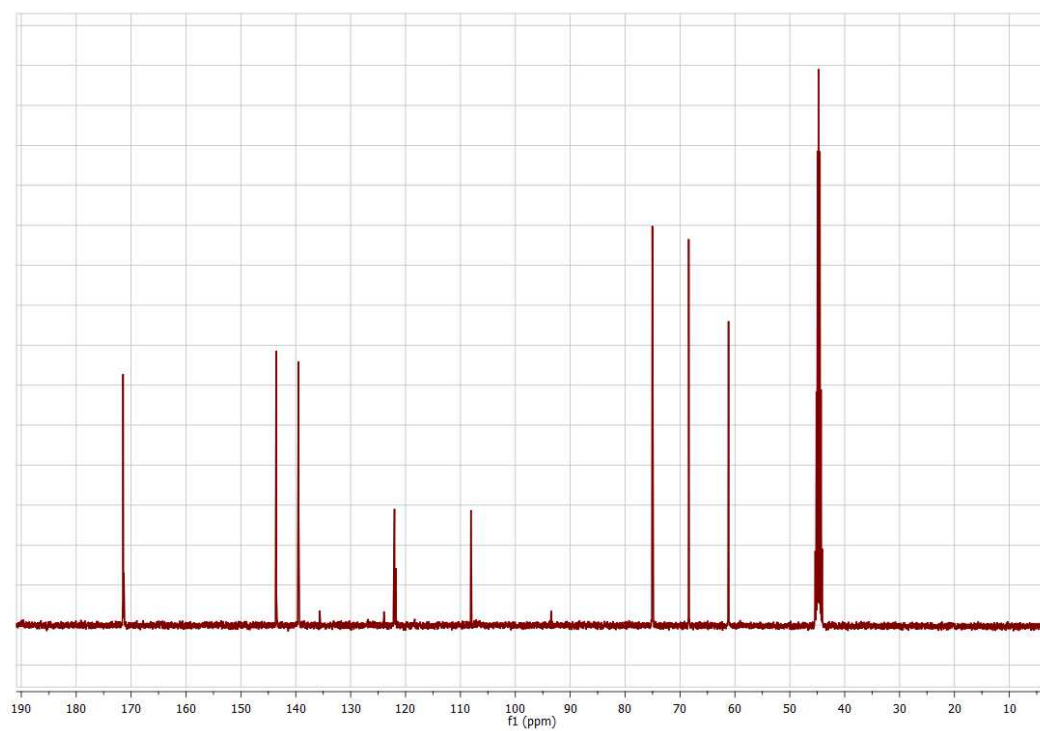

**Fig. S13.**  $^{13}\text{C}$  NMR spectrum of **HS2** in  $\text{DMSO-}d_6$ .

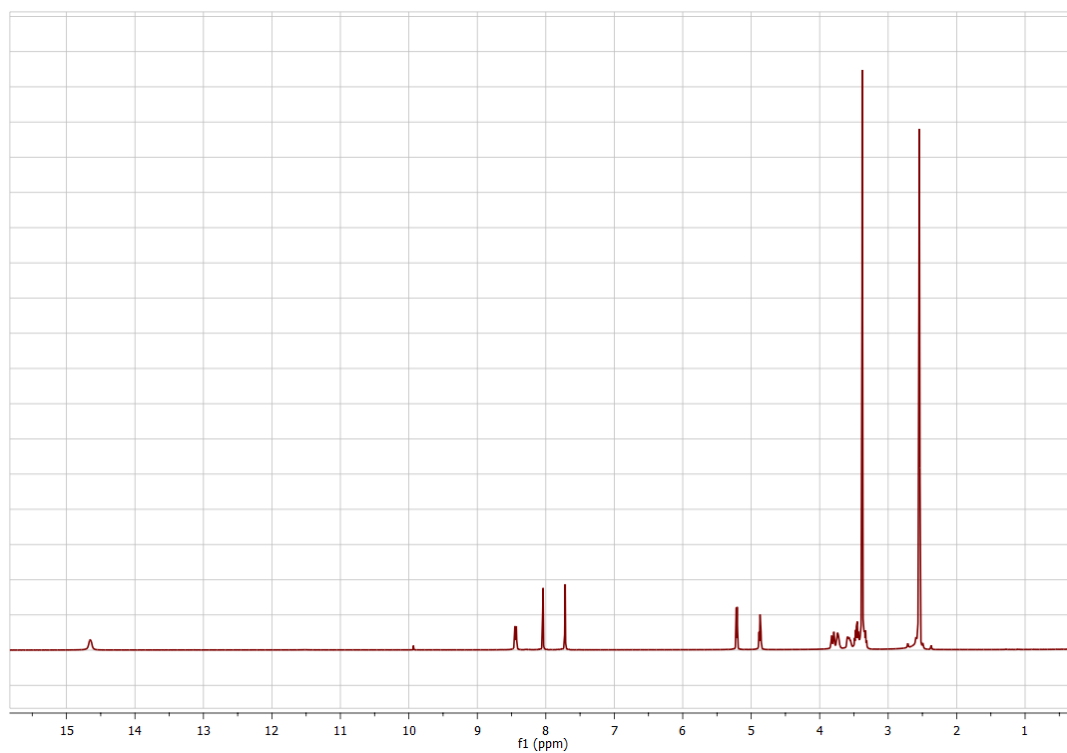

**Fig. S14.**  $^1\text{H}$  NMR spectrum of **HS3** in  $\text{DMSO-}d_6$ .

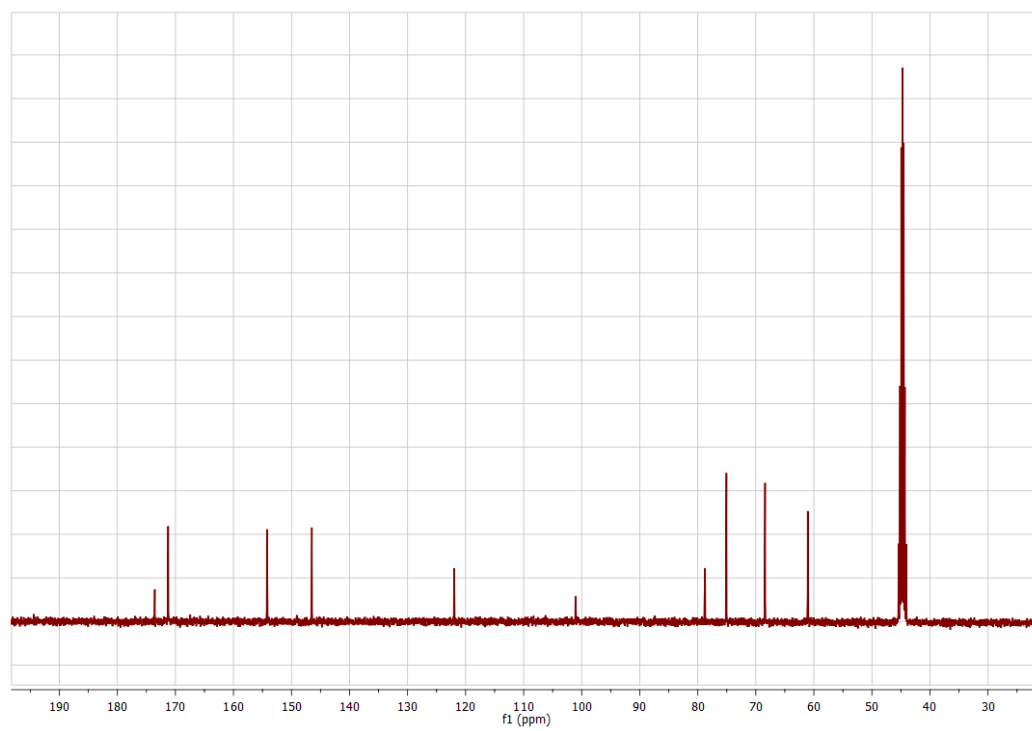

**Fig. S15.**  $^{13}\text{C}$  NMR spectrum of **HS3** in  $\text{DMSO-}d_6$ .

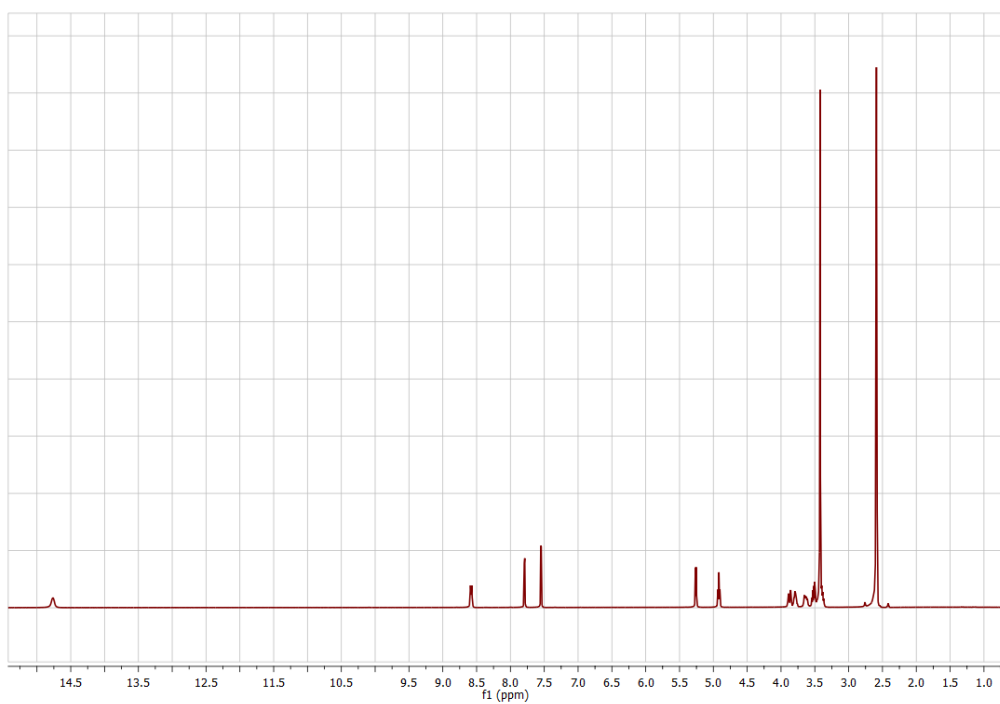

**Fig. S16.**  $^1\text{H}$  NMR spectrum of **HS4** in  $\text{DMSO-}d_6$ .

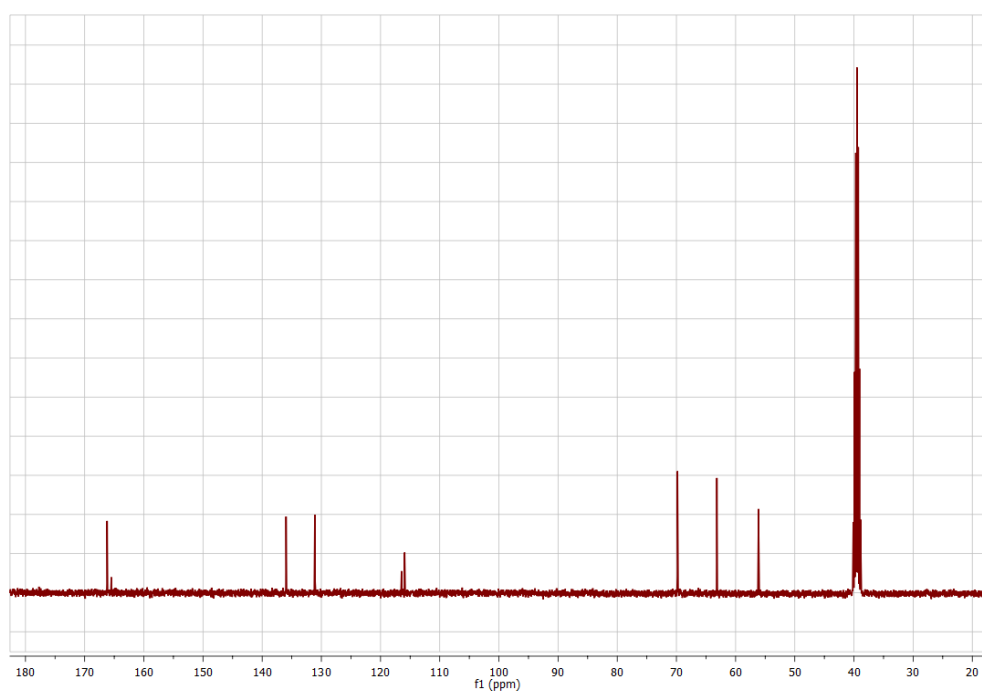

**Fig. S17.**  $^{13}\text{C}$  NMR spectrum of **HS4** in  $\text{DMSO-}d_6$ .

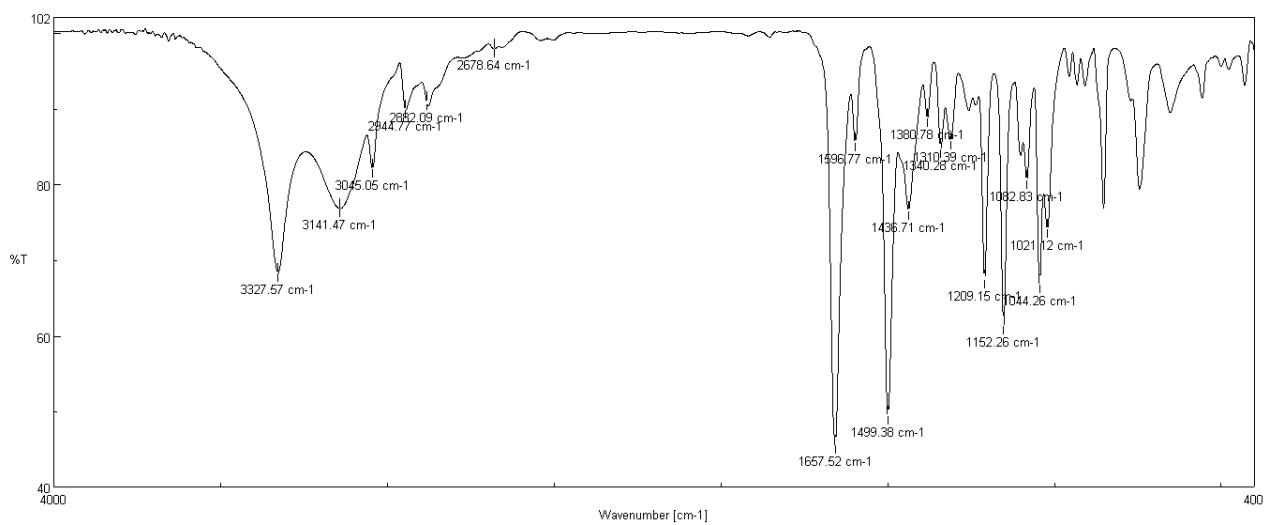

**Fig. S18** IR spectrum of **HR1**.

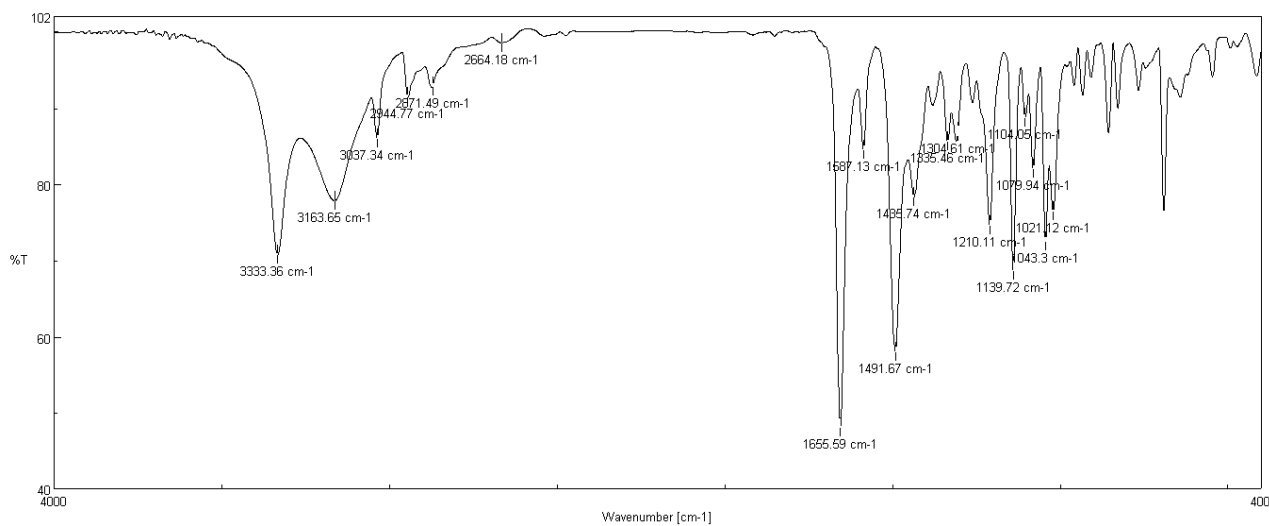

**Fig. S19** IR spectrum of **HR2**.

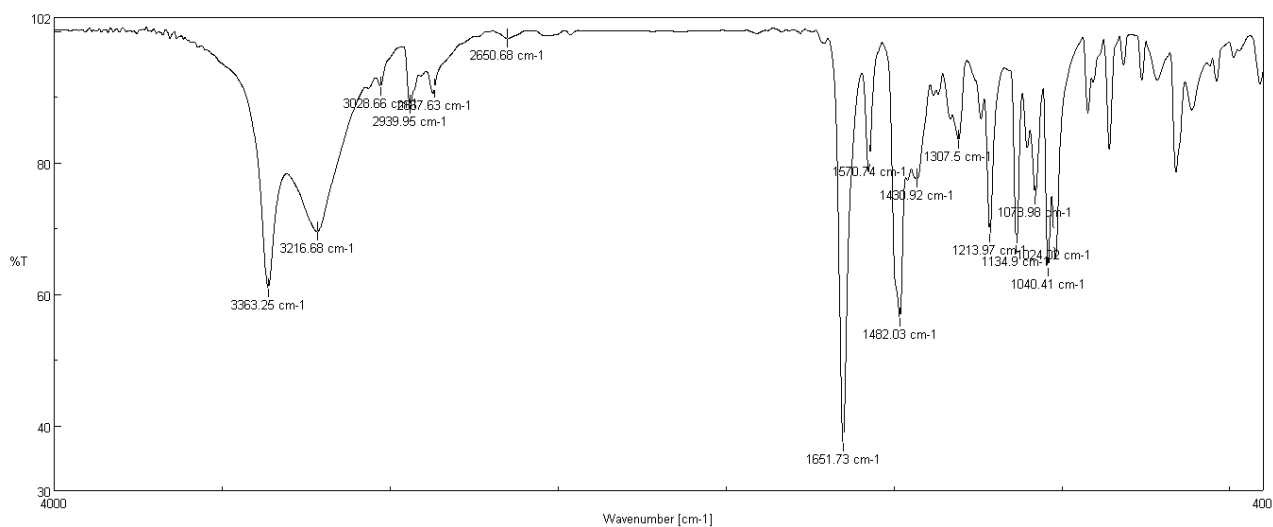

**Fig. S20** IR spectrum of **HR3**.

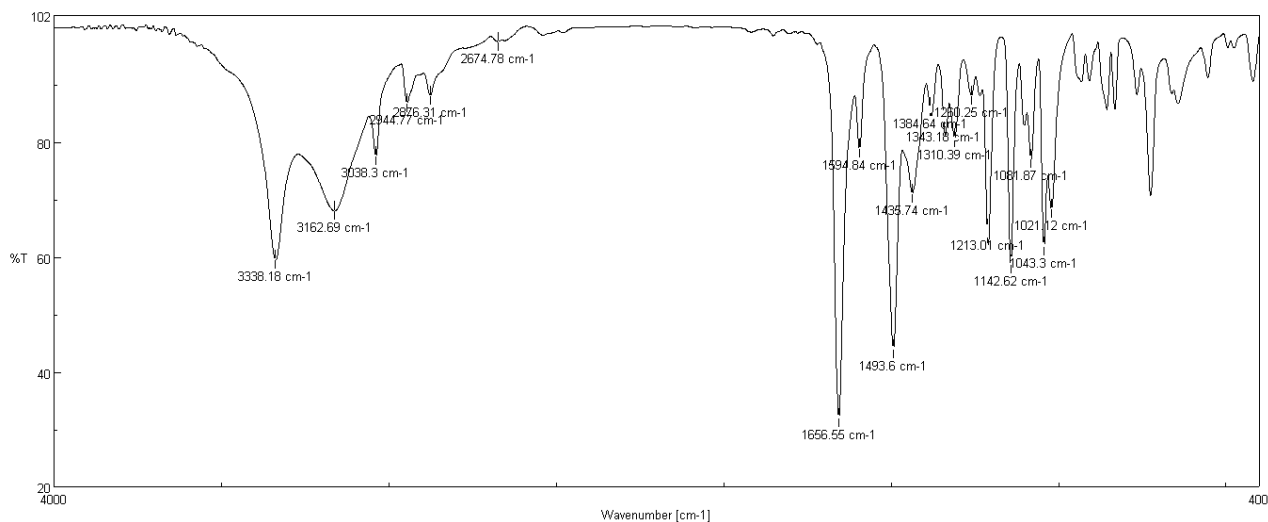

**Fig. S21** IR spectrum of HR4.

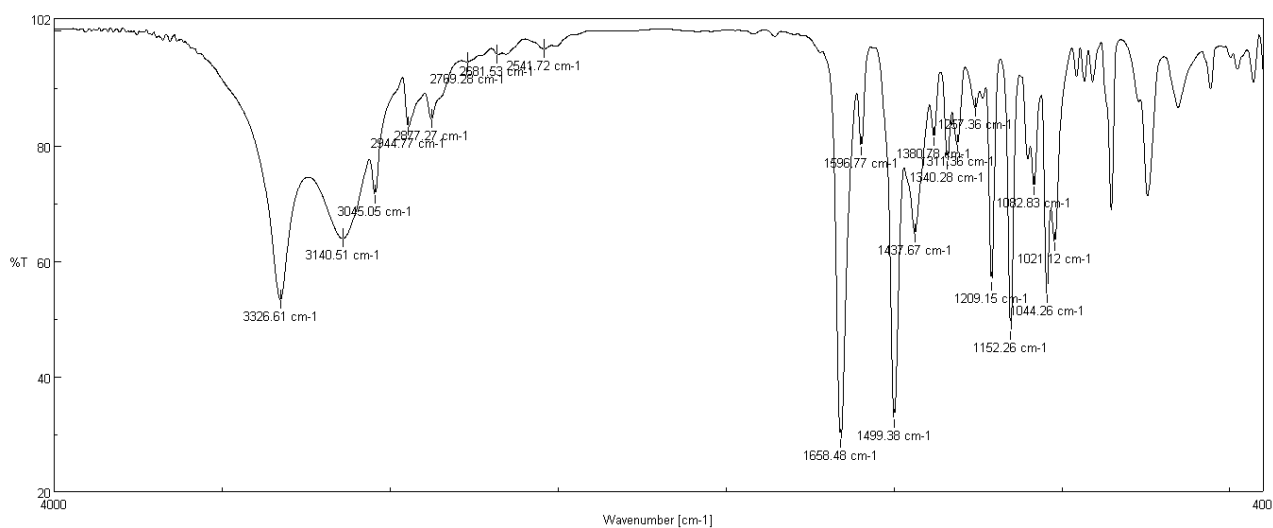

**Fig. S22** IR spectrum of HS1.

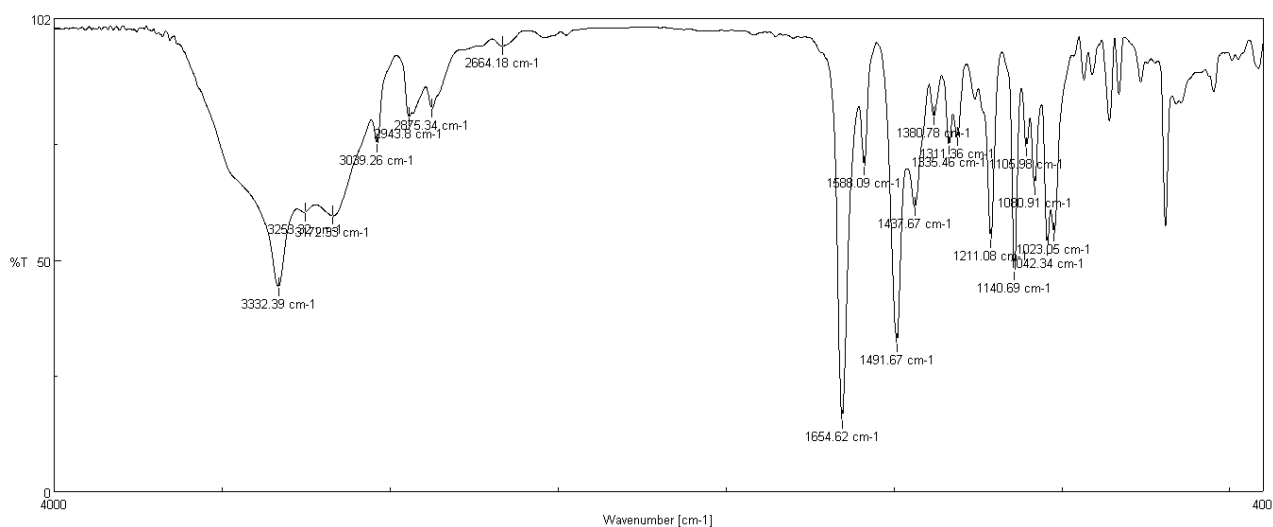

**Fig. S23** IR spectrum of HS2.

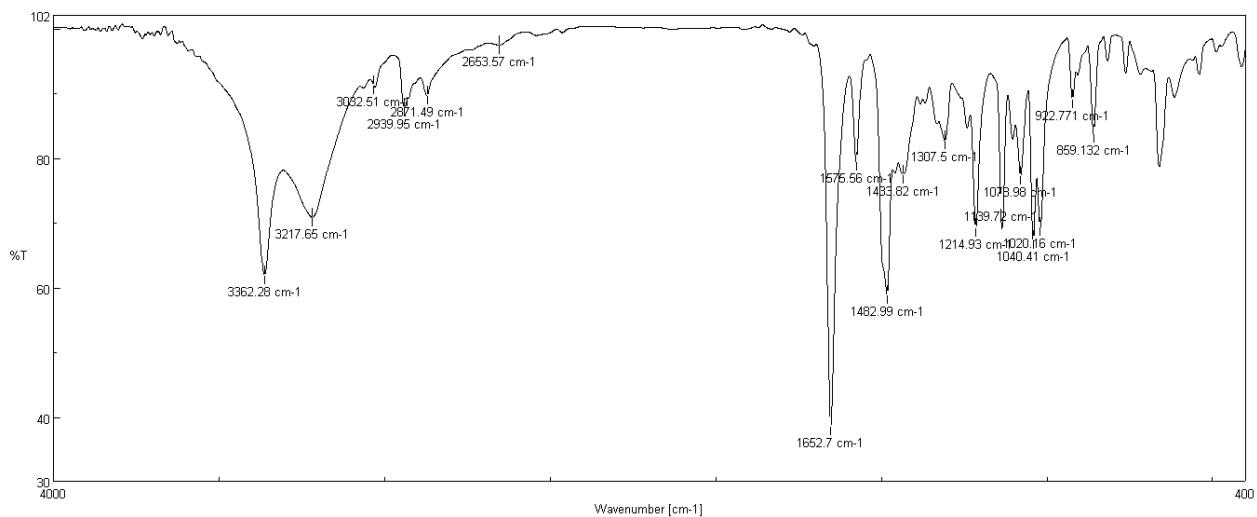

**Fig. S24** IR spectrum of **HS3**.

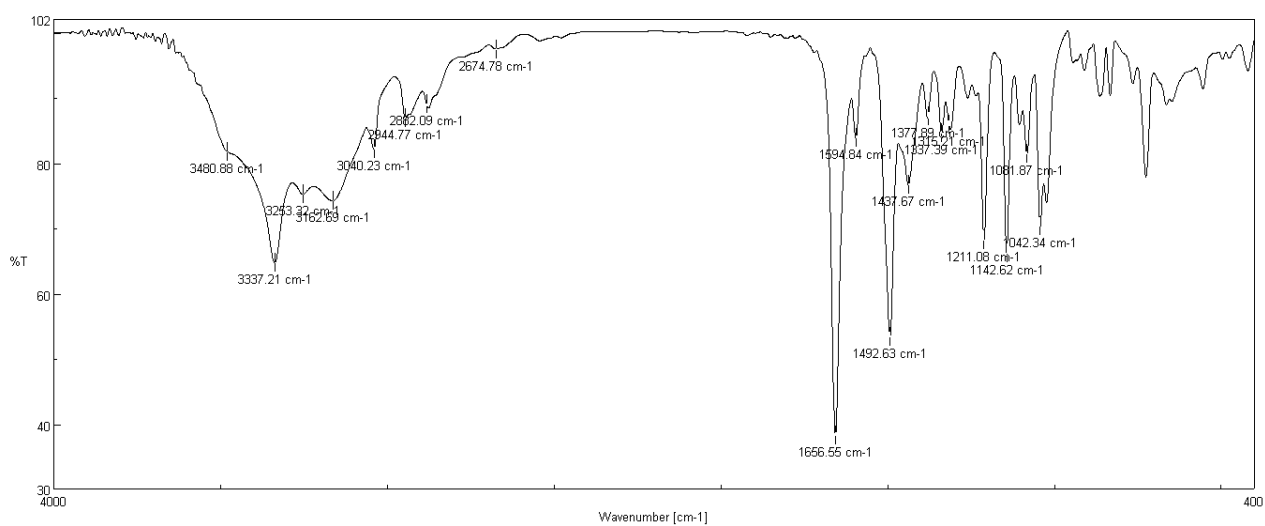

**Fig. S25** IR spectrum of **HS4**.

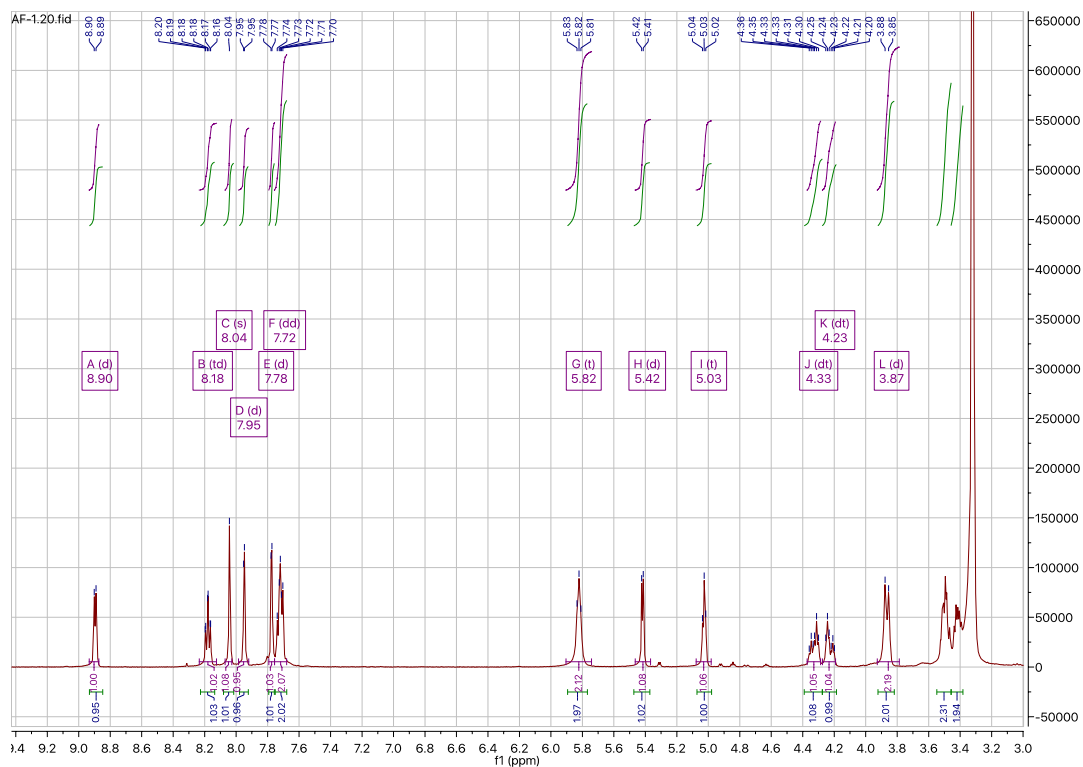

Fig. S26  $^1\text{H}$  NMR spectrum of **J1** in  $\text{DMSO-}d_6$ .

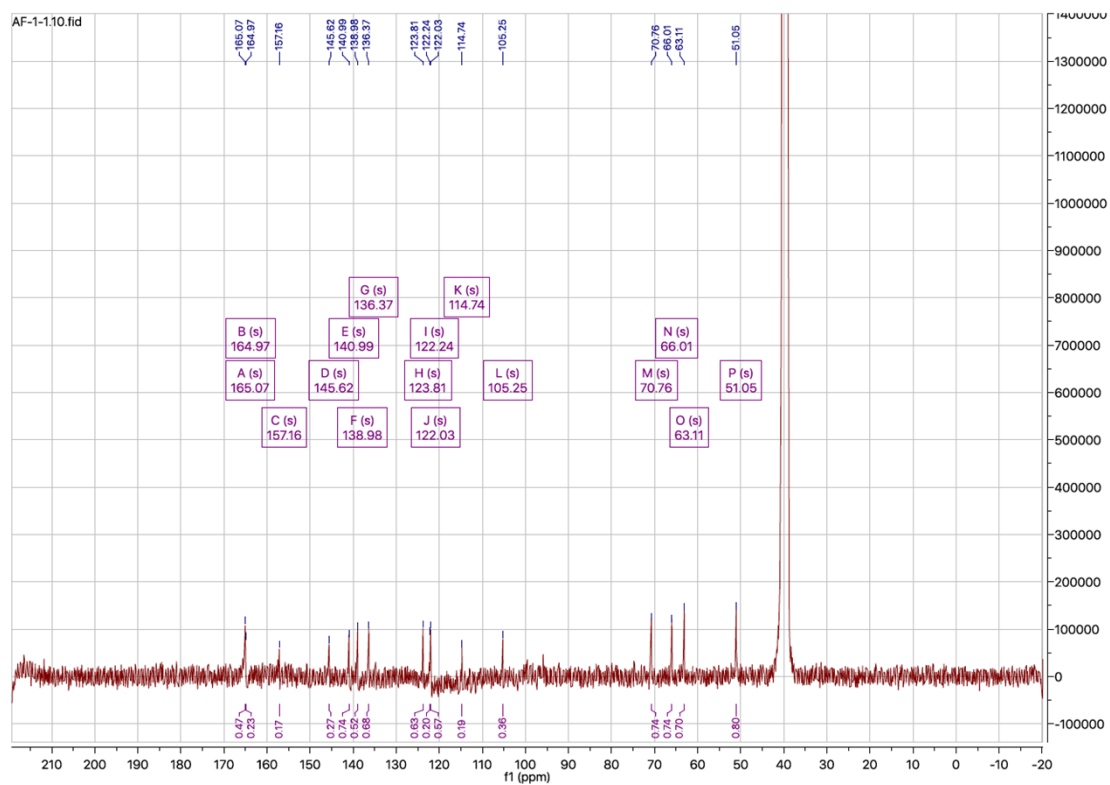

Fig. S27  $^{13}\text{C}$  NMR spectrum of **J1** in  $\text{DMSO-}d_6$ .



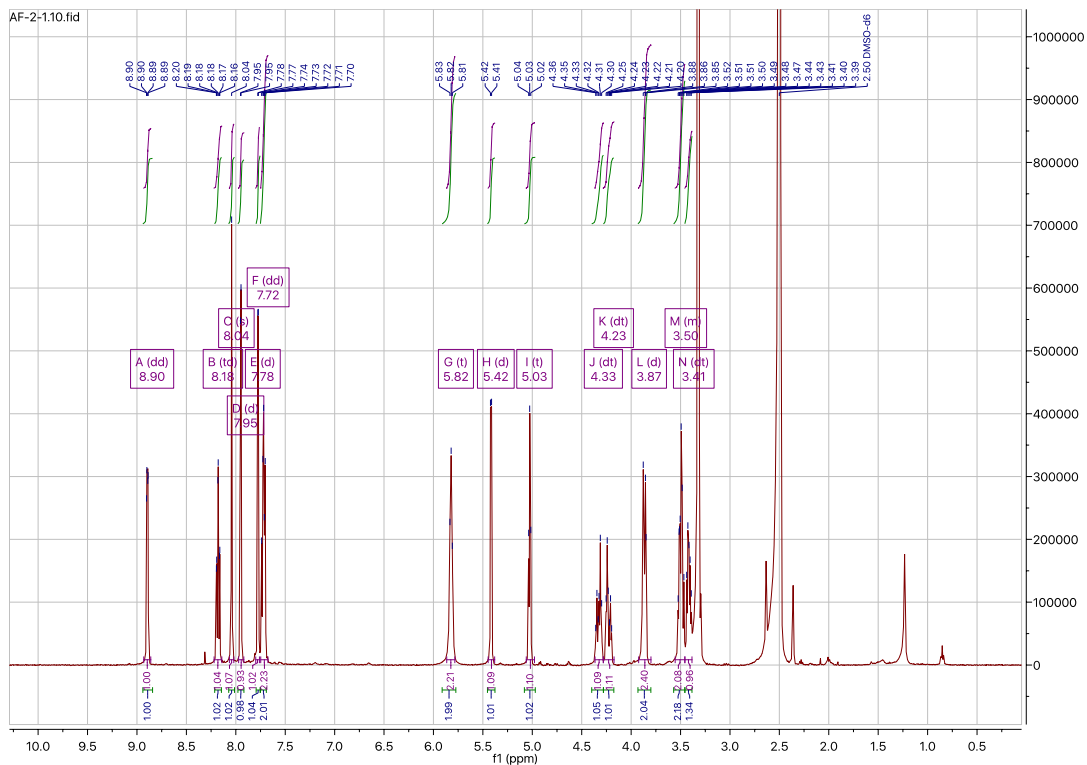

Fig. S28  $^1\text{H}$  NMR spectrum of **J2** in  $\text{DMSO-}d_6$ .

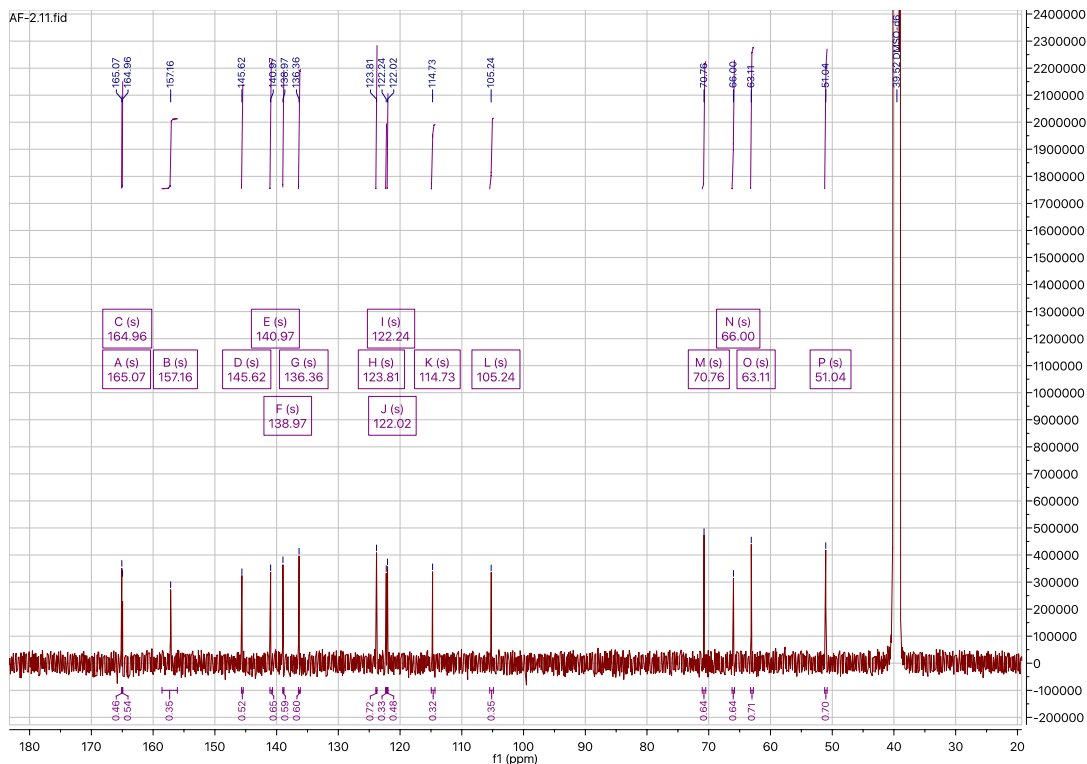

Fig. S29  $^{13}\text{C}$  NMR spectrum of **J2** in  $\text{DMSO-}d_6$ .

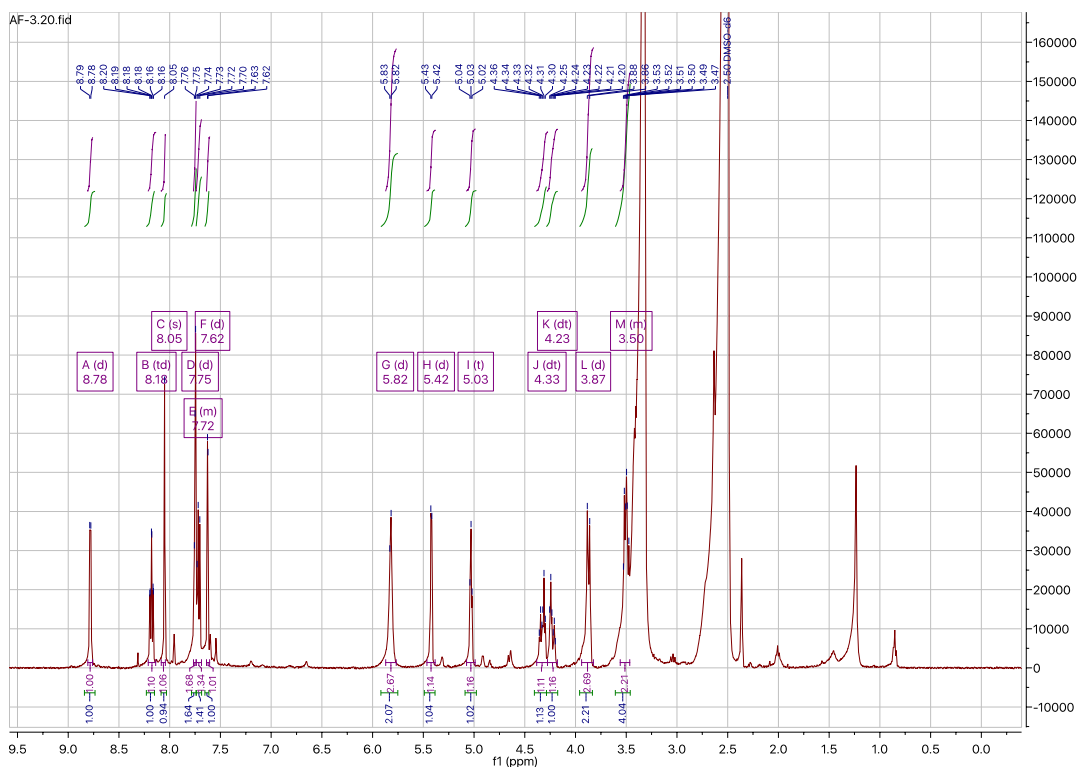

Fig. S30  $^1\text{H}$  NMR spectrum of **J3** in  $\text{DMSO-}d_6$ .

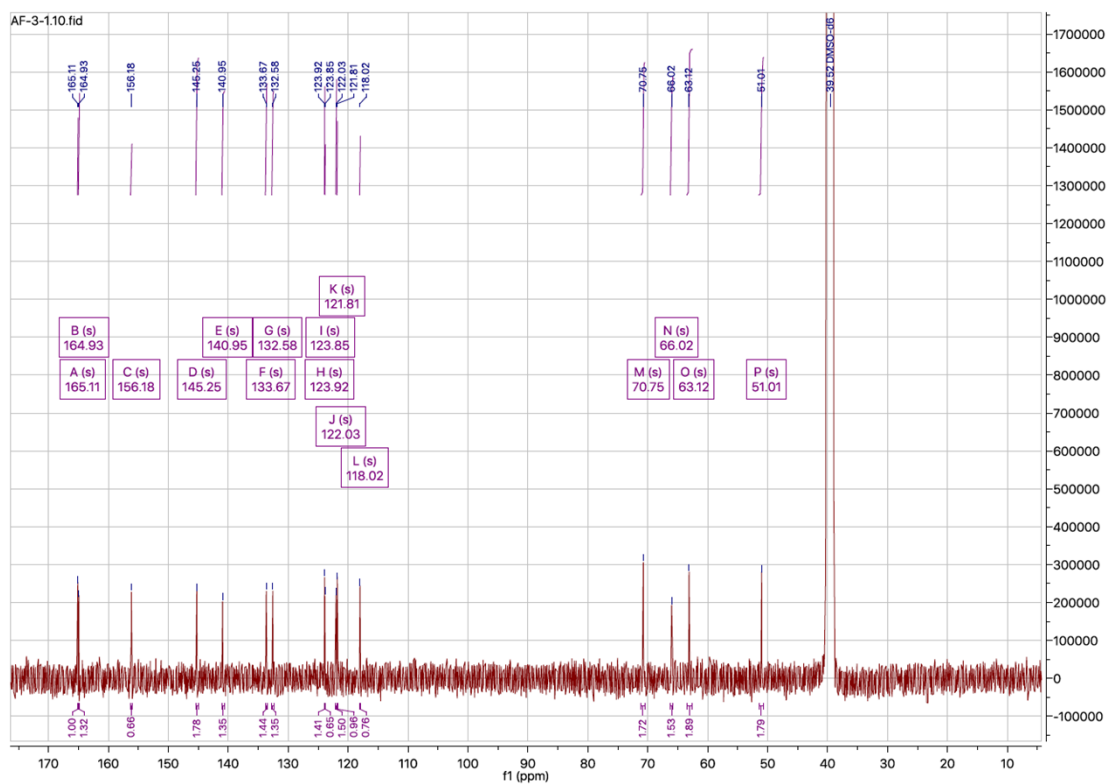

Fig. S31  $^{13}\text{C}$  NMR spectrum of **J3** in  $\text{DMSO-}d_6$ .

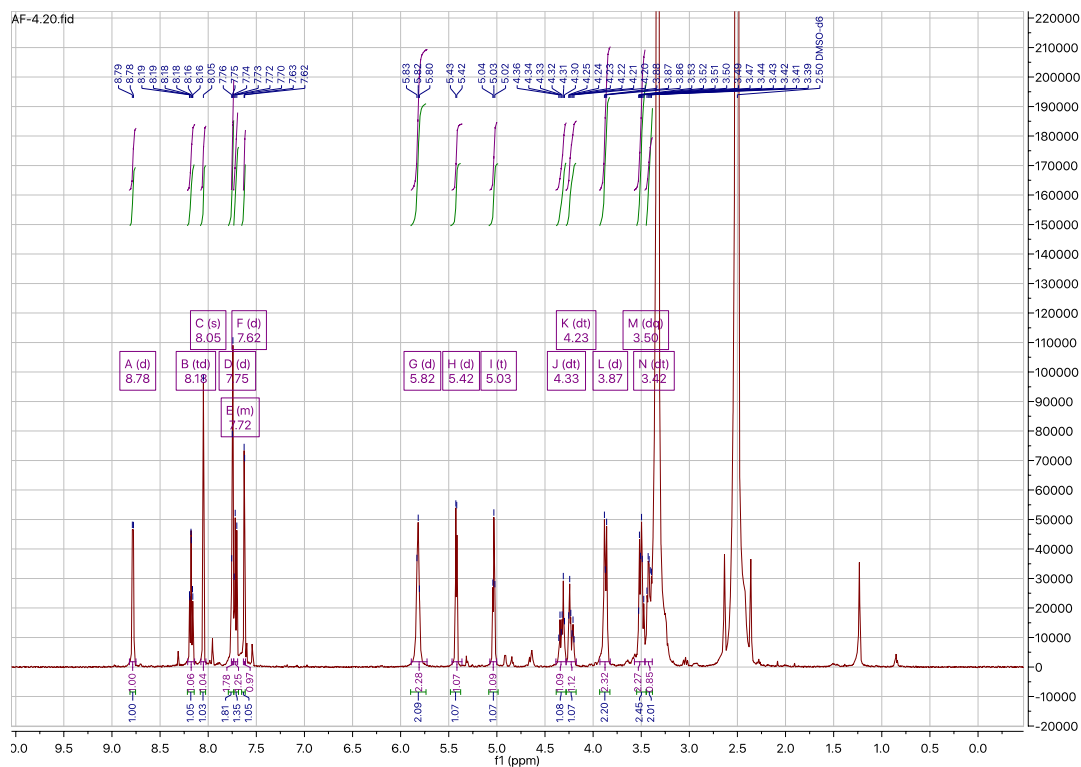

Fig. S32  $^1\text{H}$  NMR spectrum of J4 in DMSO- $d_6$ .

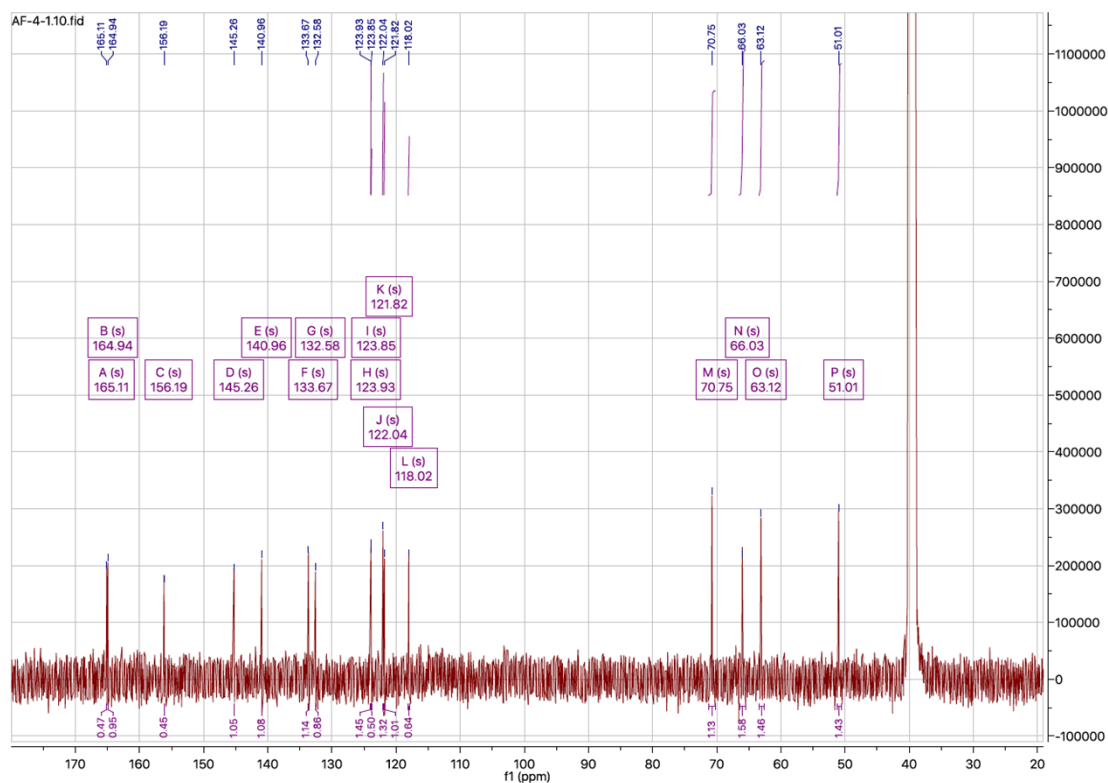

Fig. S33  $^{13}\text{C}$  NMR spectrum of J4 in DMSO- $d_6$ .

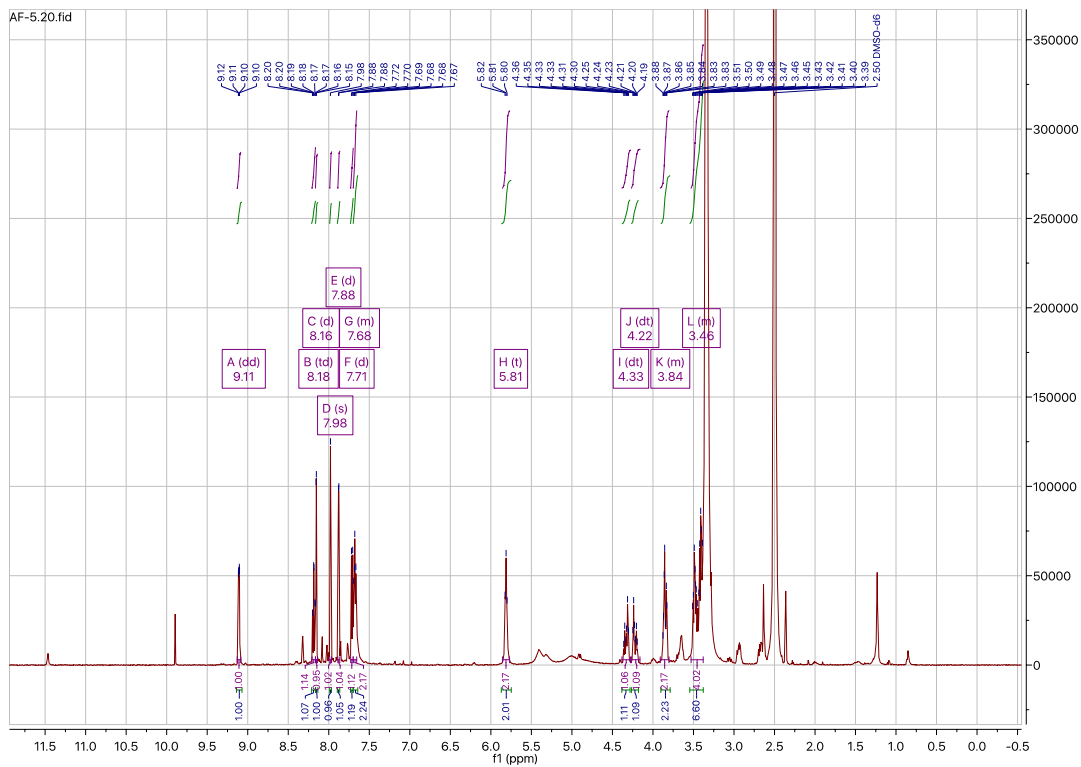

Fig. S34  $^1\text{H}$  NMR spectrum of **J5** in  $\text{DMSO-}d_6$ .

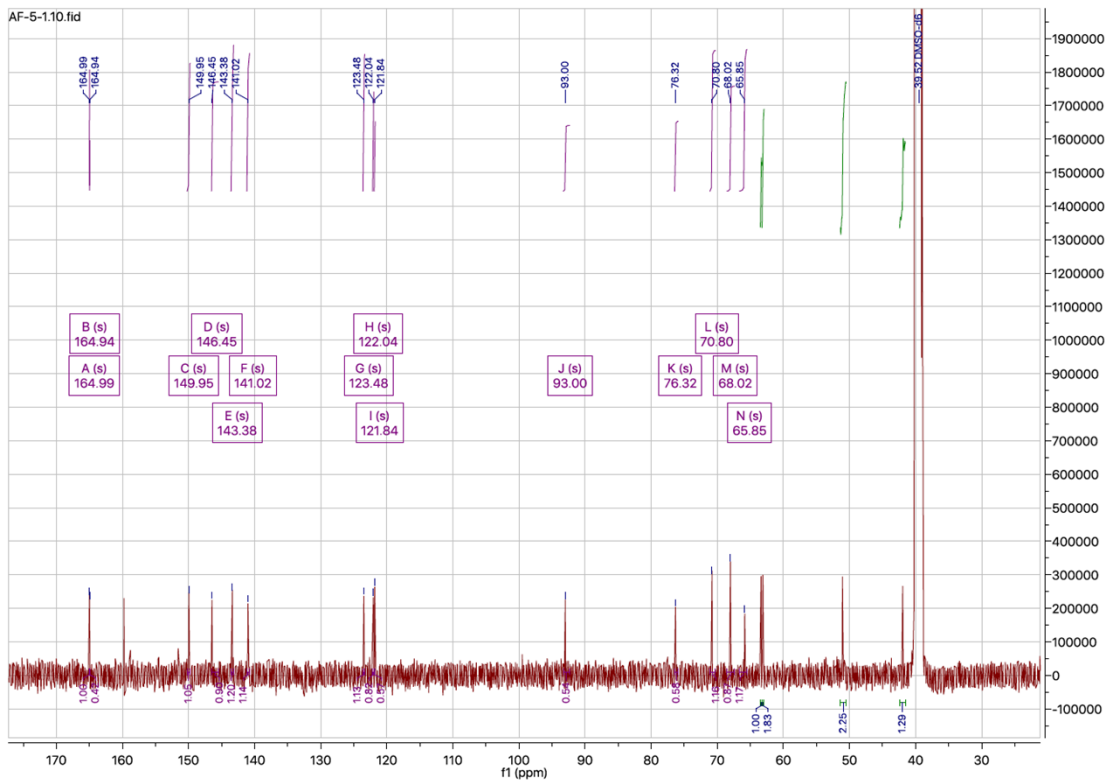

Fig. S35  $^{13}\text{C}$  NMR spectrum of **J5** in  $\text{DMSO-}d_6$ .

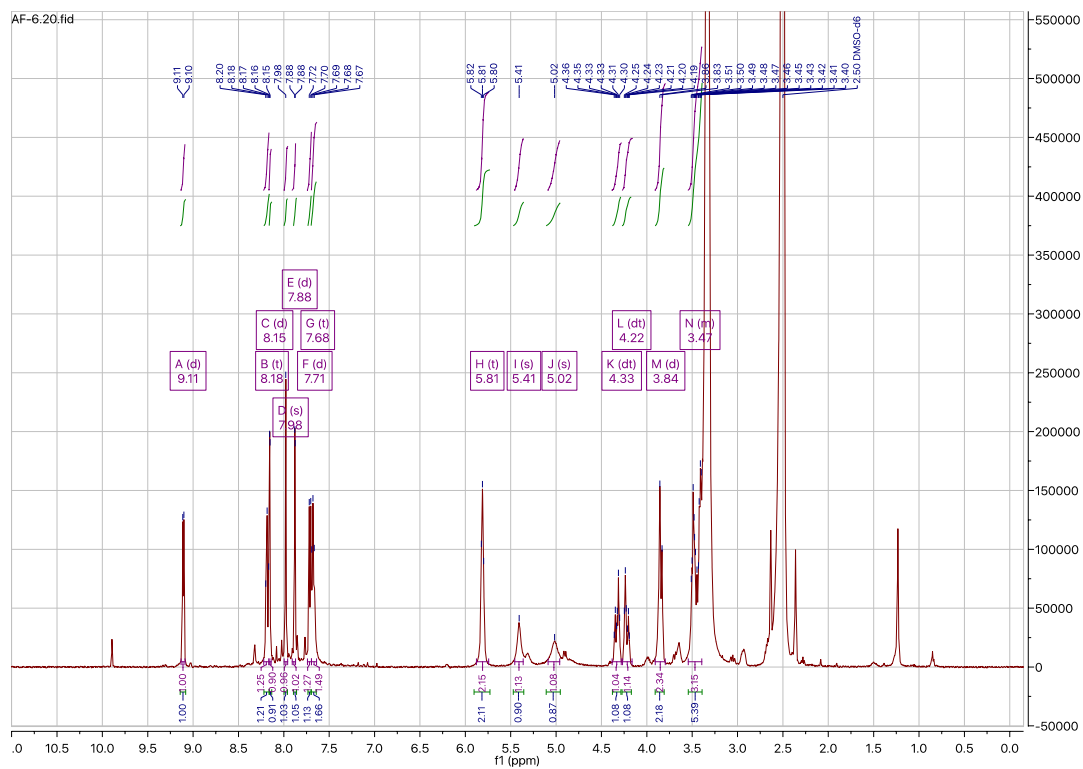

Fig. S36  $^1\text{H}$  NMR spectrum of **J6** in  $\text{DMSO-}d_6$ .

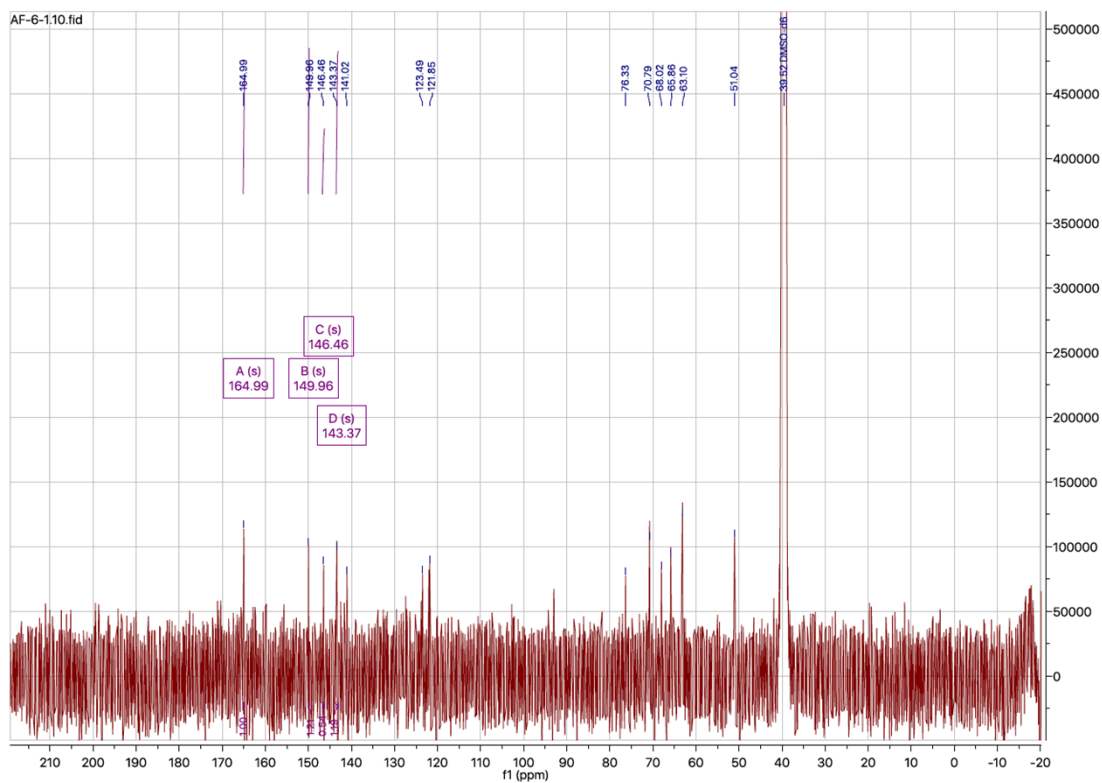

Fig. S37  $^{13}\text{C}$  NMR spectrum of **J6** in  $\text{DMSO-}d_6$ .

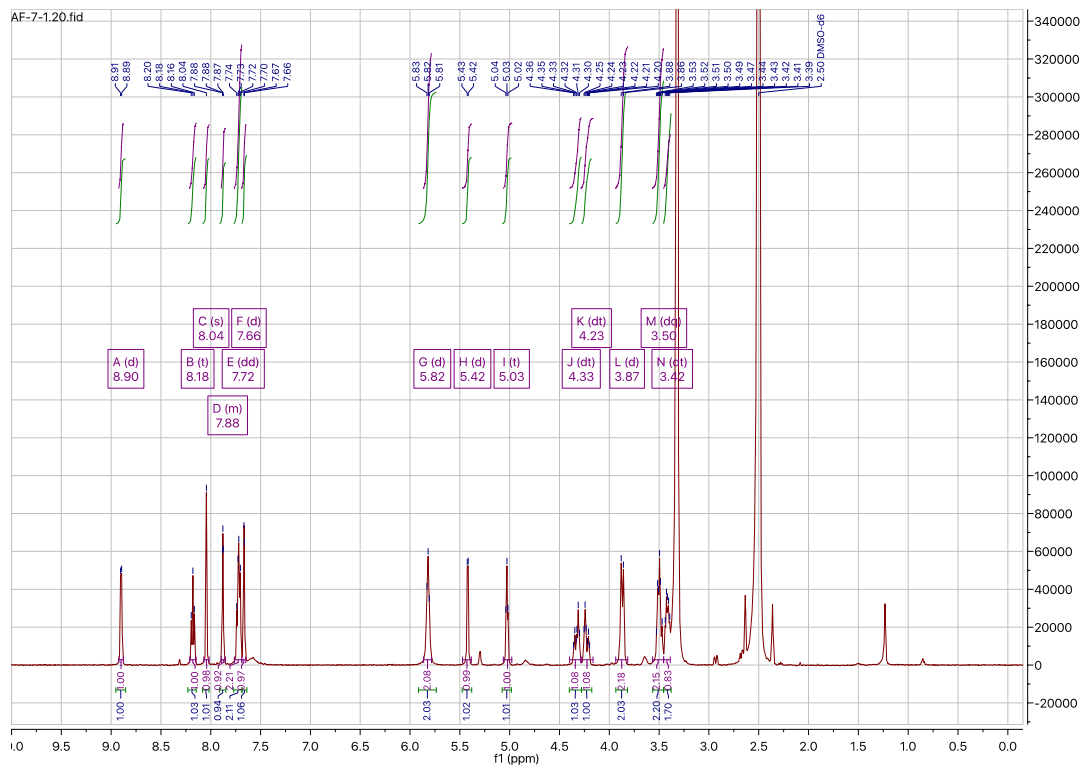

Fig. S38  $^1\text{H}$  NMR spectrum of **J7** in  $\text{DMSO-}d_6$ .

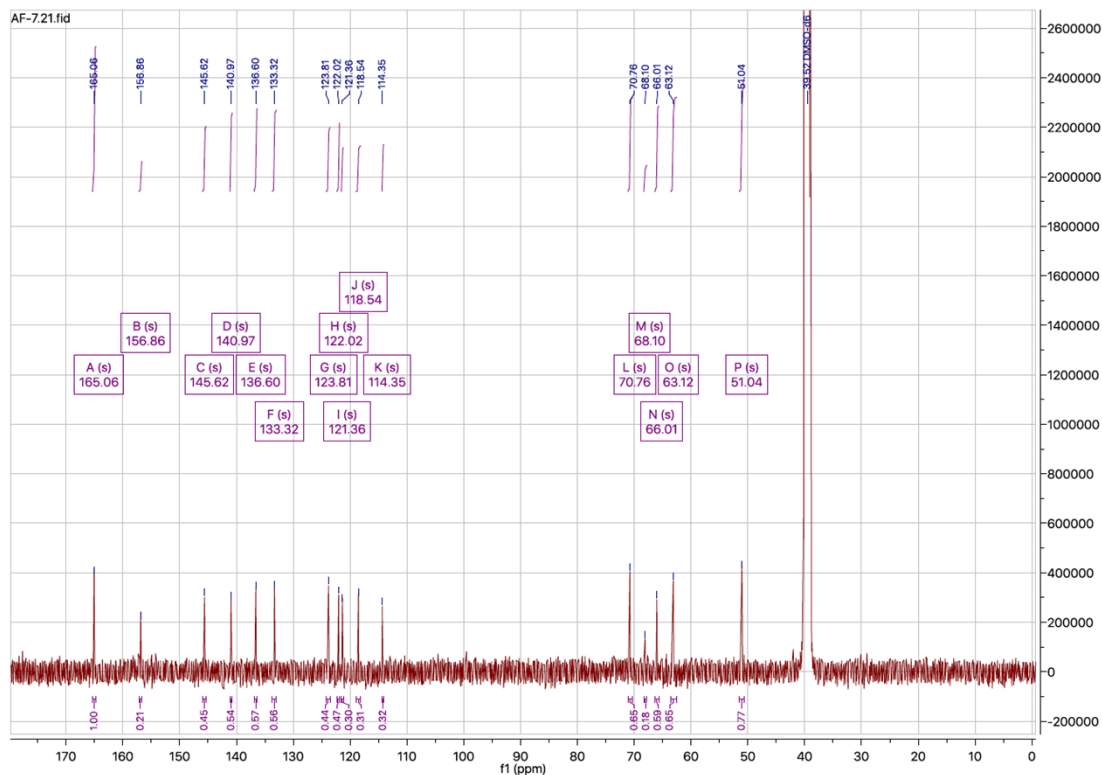

Fig. S39  $^{13}\text{C}$  NMR spectrum of **J7** in  $\text{DMSO-}d_6$ .

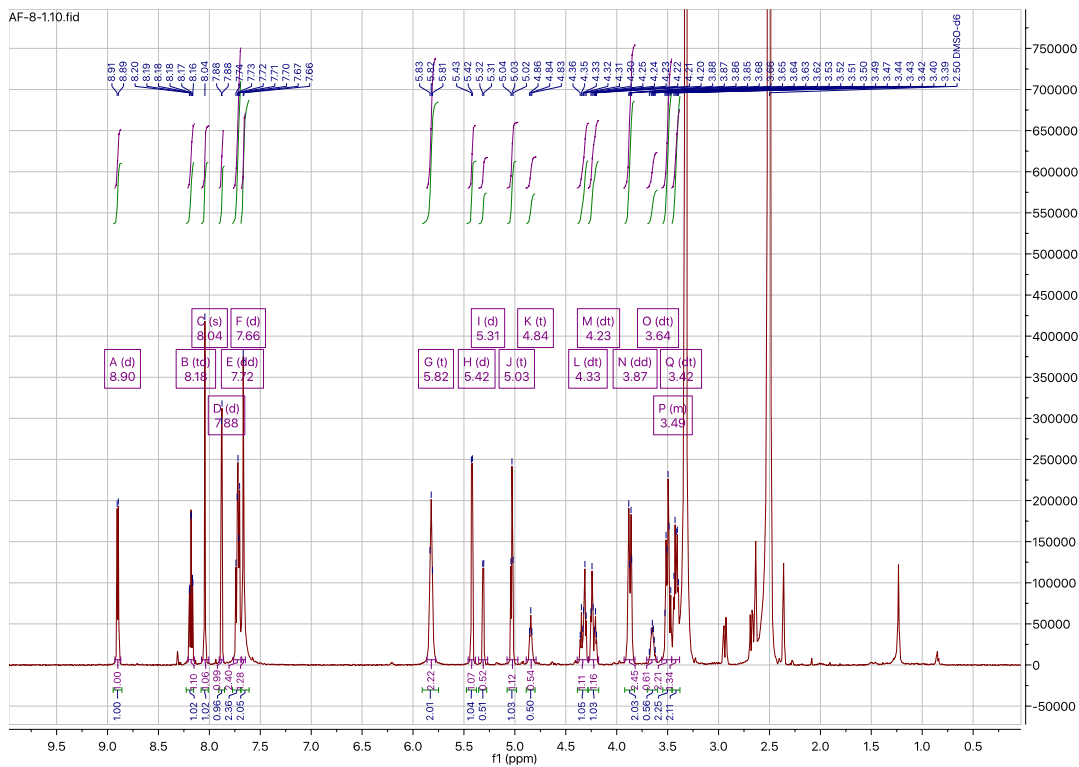

Fig. S40  $^1\text{H}$  NMR spectrum of **J8** in  $\text{DMSO-}d_6$ .

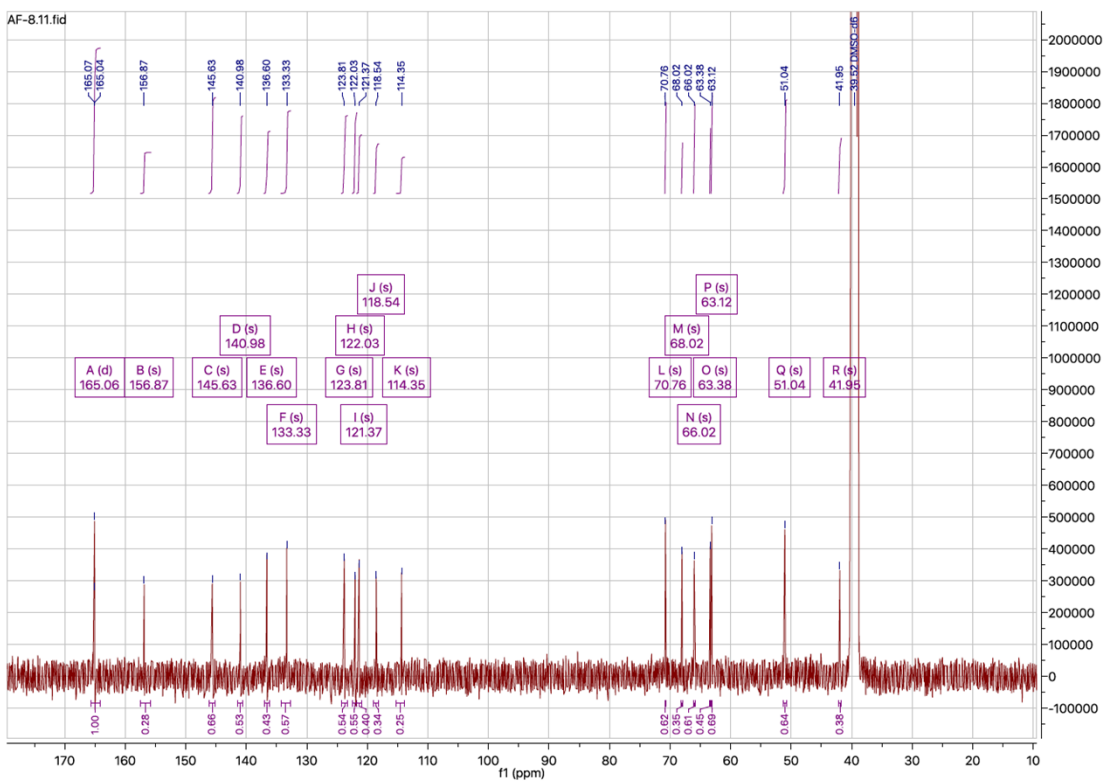

Fig. S41  $^{13}\text{C}$  NMR spectrum of **J8** in  $\text{DMSO-}d_6$ .

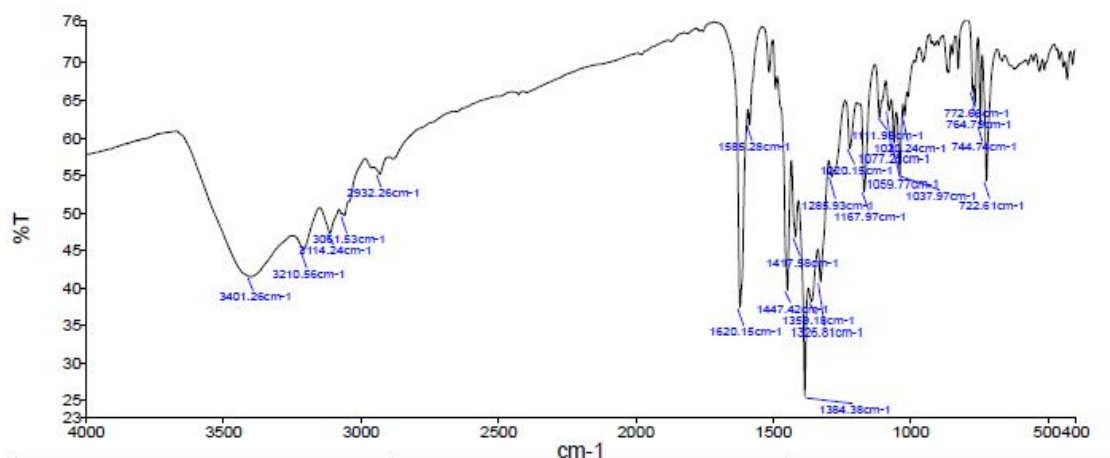

Fig. S42 IR spectrum of J1

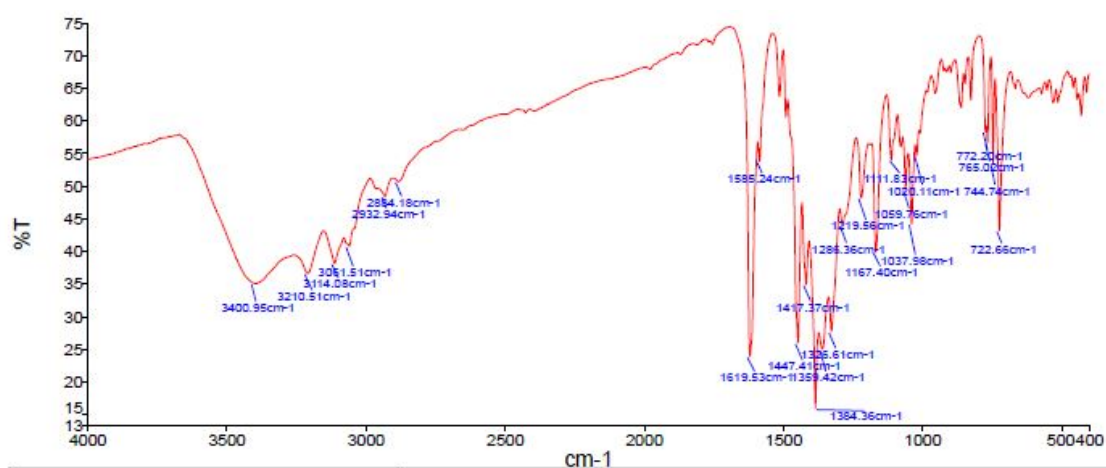

Fig. S43 IR spectrum of J2

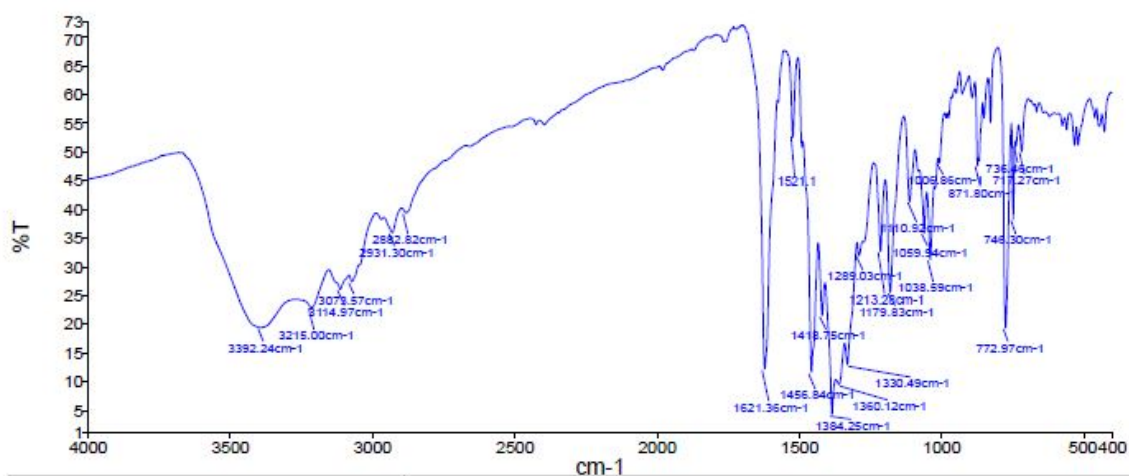

Fig. S44 IR spectrum of J3



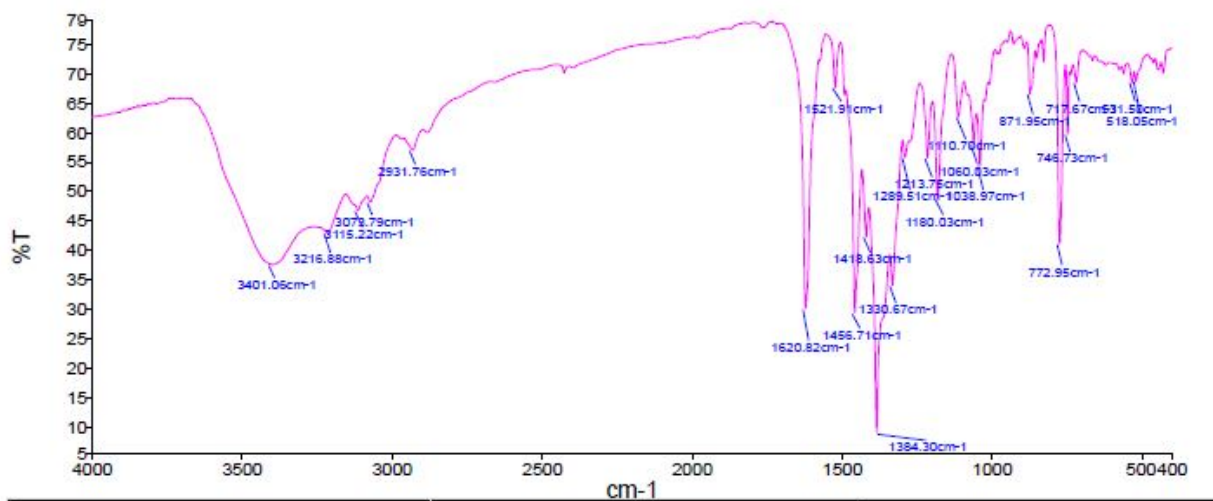

Fig. S45 IR spectrum of J4

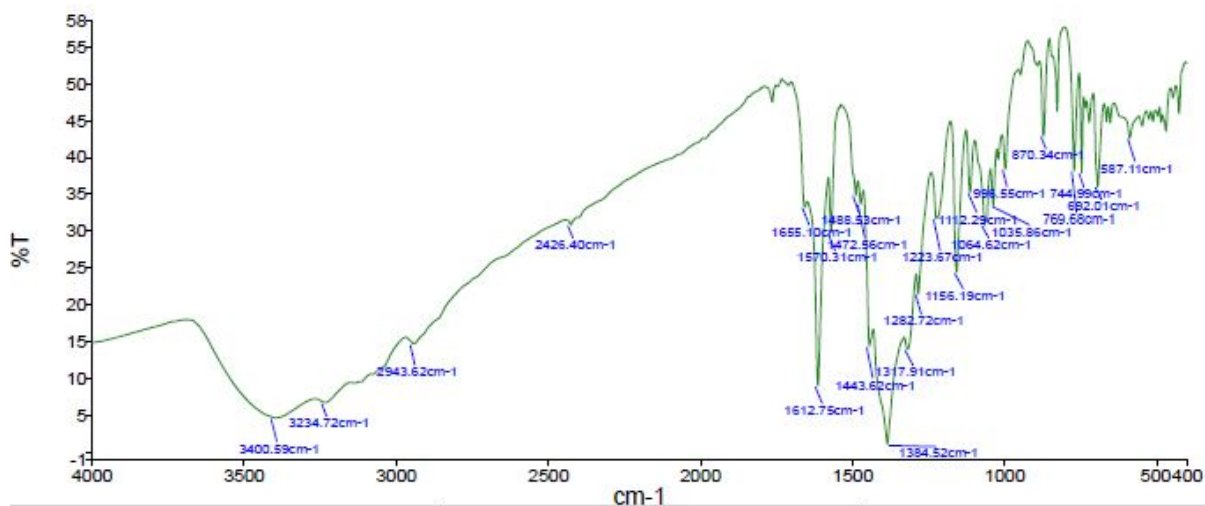

Fig. S46 IR spectrum of J5

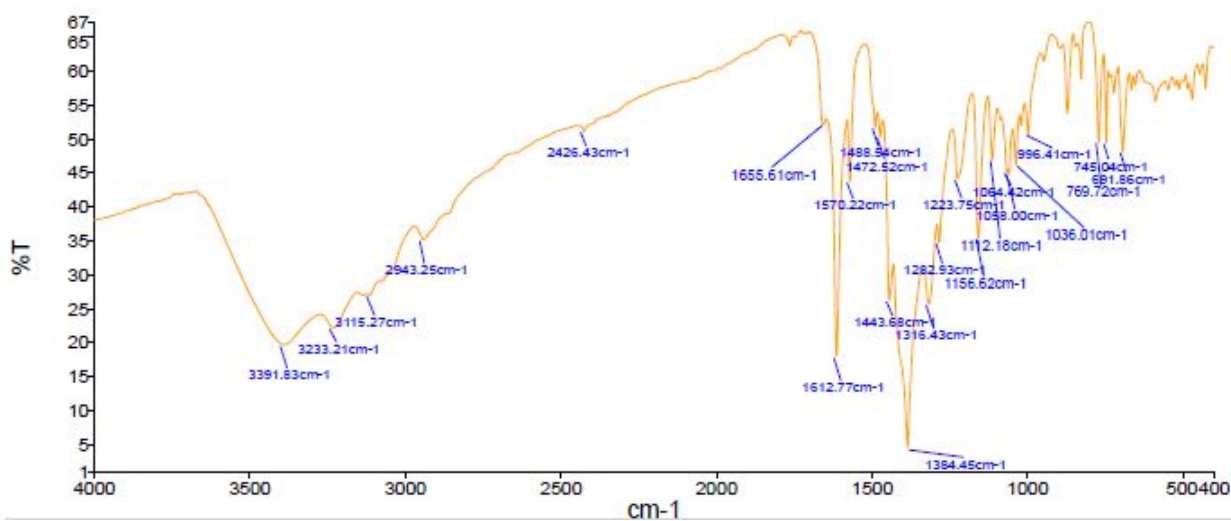

Fig. S47 IR spectrum of J6

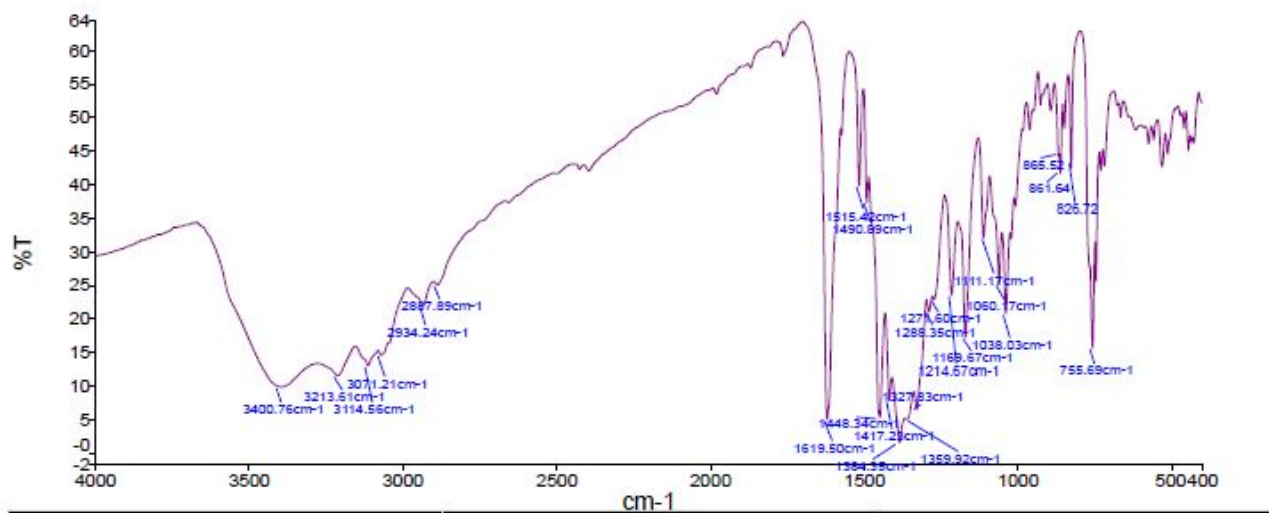

Fig. S48 IR spectrum of J7

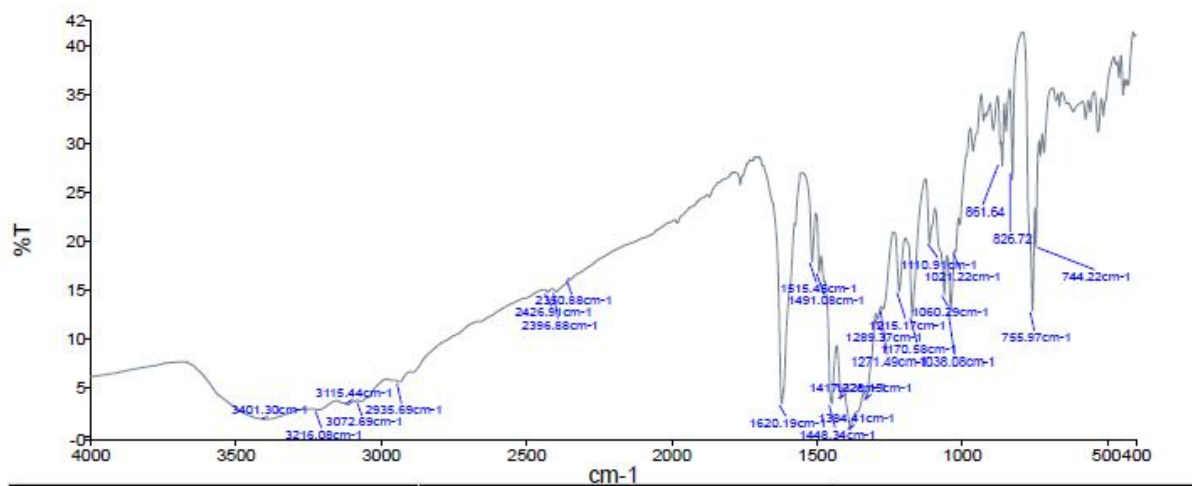

Fig. S49 IR spectrum of J8

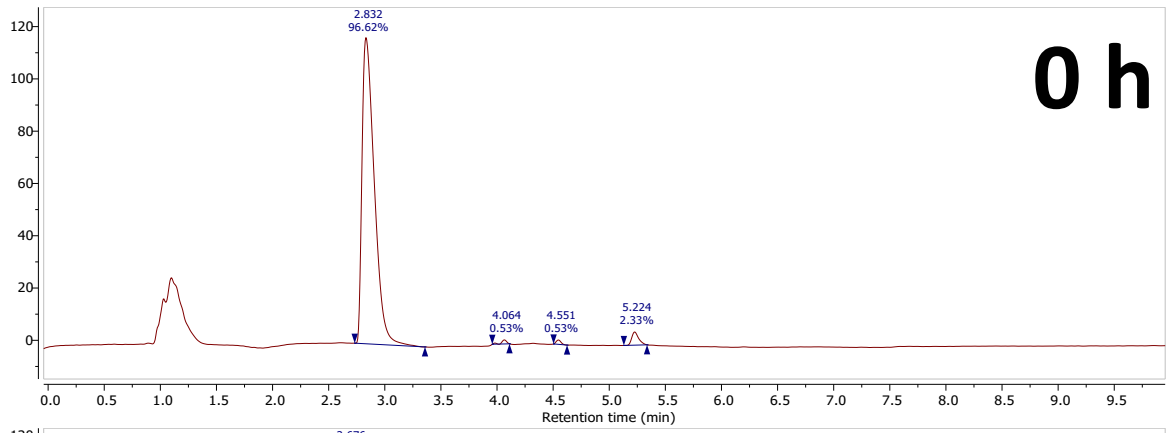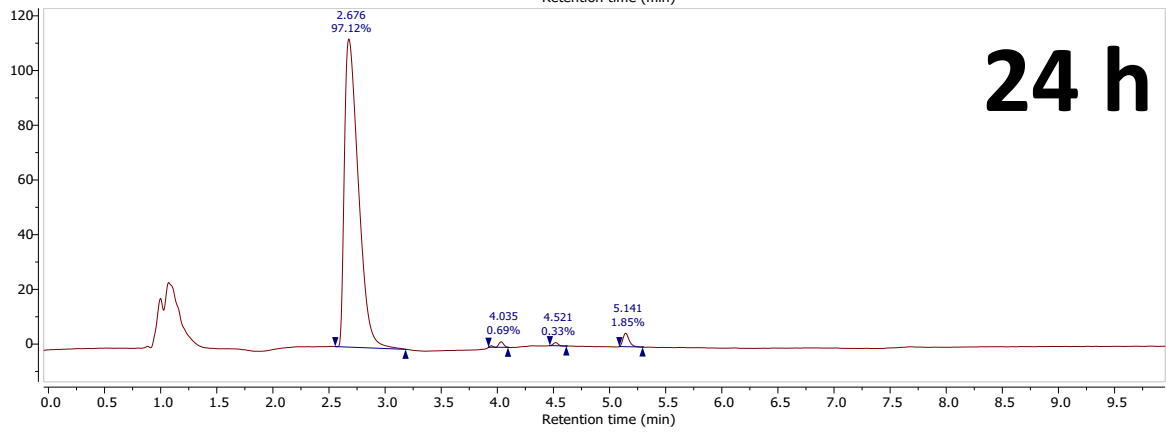

**Fig. S50: LC/MS spectrum of J4 in PBS buffer (pH = 7.4).**

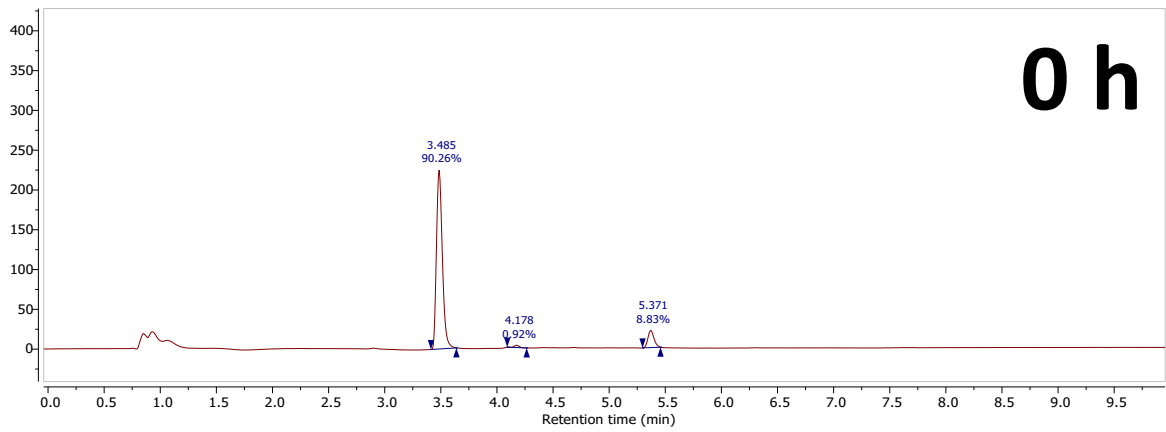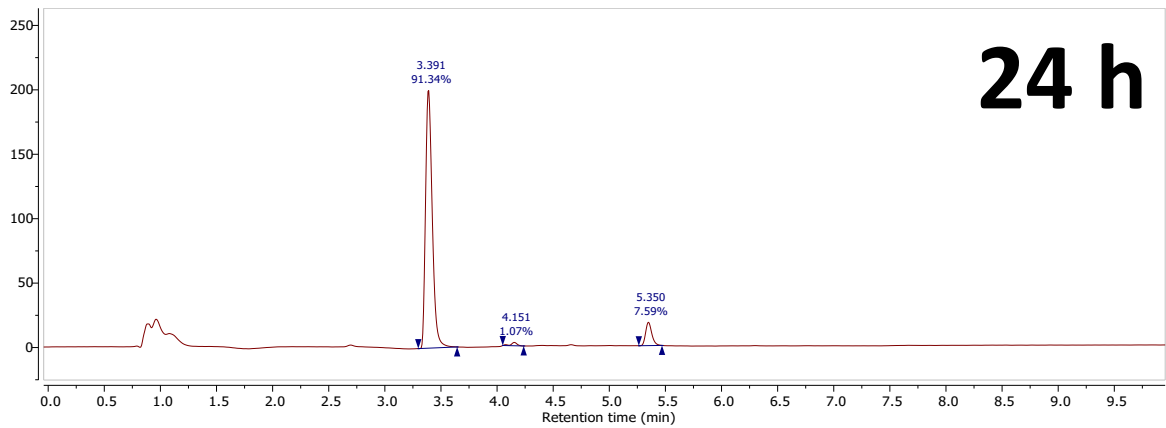

**Fig. S51: LC/MS spectrum of J4 in proteasome assay buffer (pH = 7.4).**

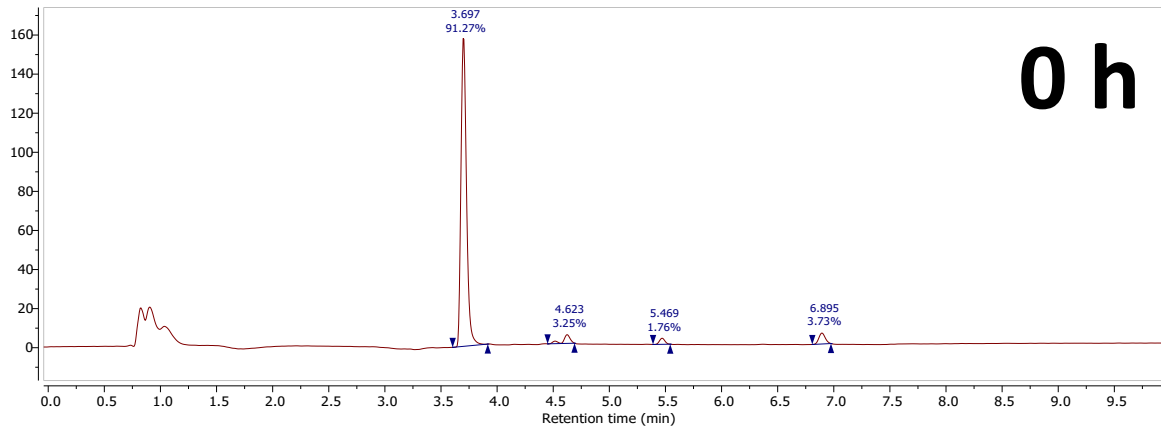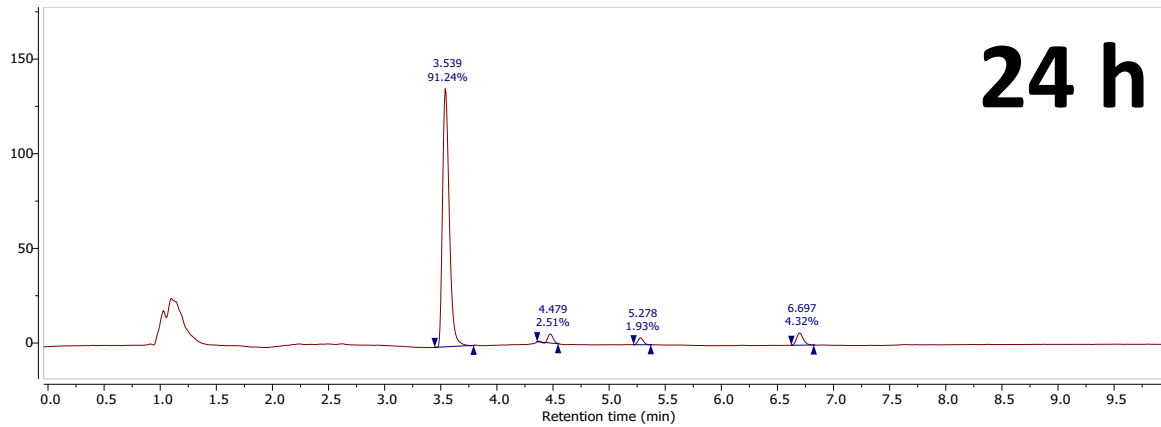

**Fig. S52: LC/MS spectrum of J6 in PBS buffer (pH = 7.4).**

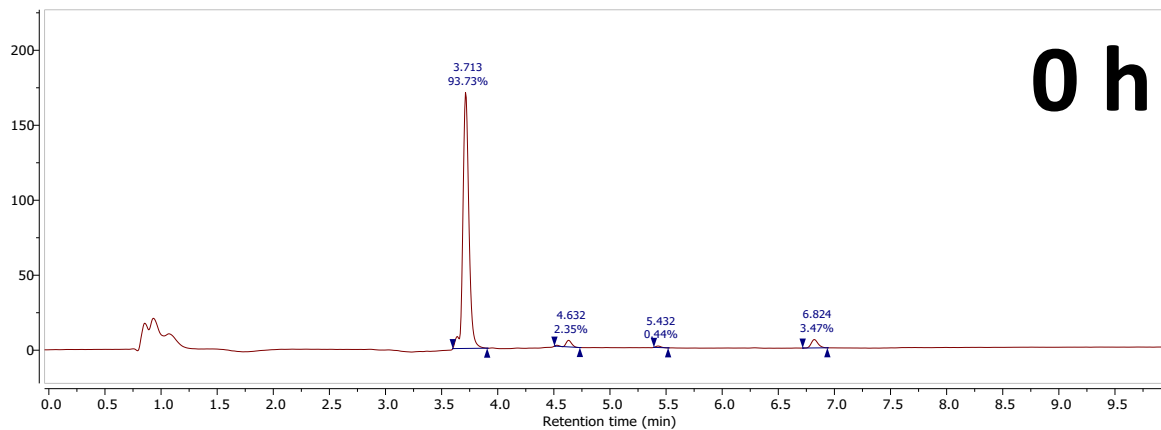

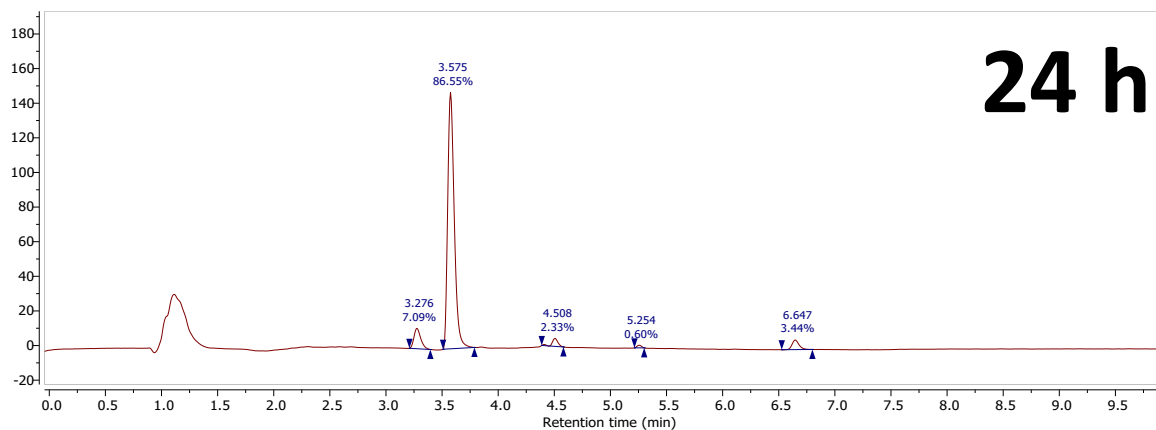

**Fig. S53:** LC/MS spectrum of **J6** in proteasome assay buffer (pH = 7.4).

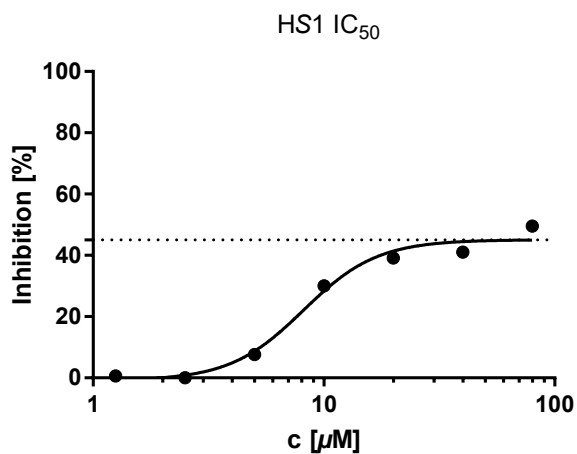

**Fig. S54:** Concentration-response curve of **HS1** (*i.e.* J4 ligand) towards 20S proteasome inhibition.

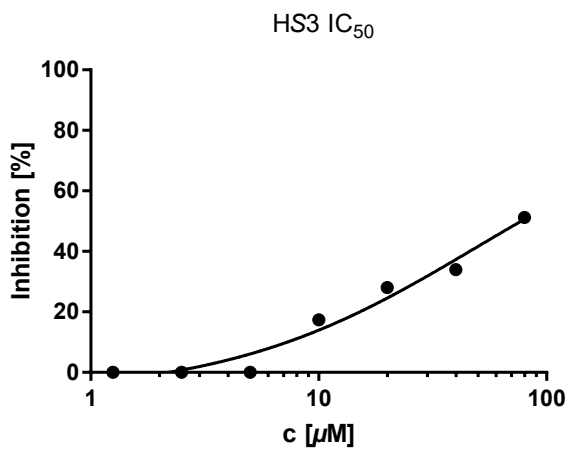

**Fig. S55:** Concentration-response curve of **HS3** (*i.e.* J6 ligand) towards 20S proteasome inhibition.

### HS1 (J4-Ligand)

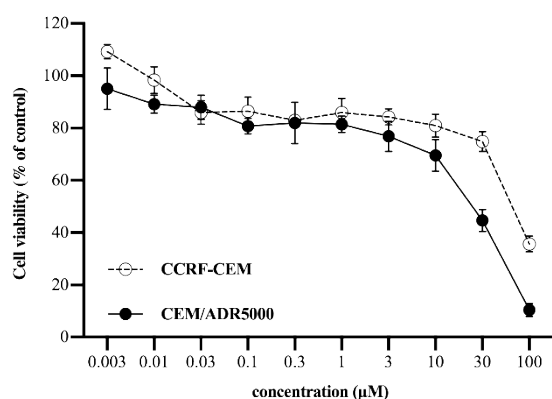

### HS3 (J6-Ligand)

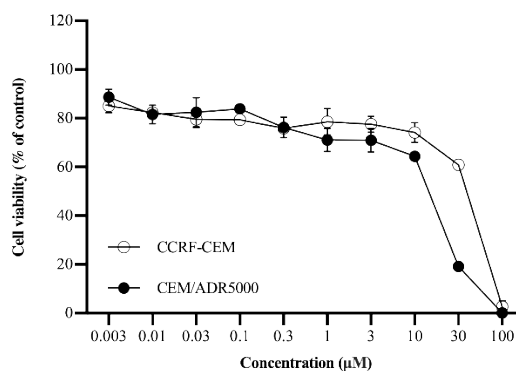

**Fig. S56.** Concentration-response curves of the Schiff base ligands **HS1** and **HS3** (for the Pd(II) complexes **J4** and **J6**, respectively) towards CCRF-CEM and CEM/ADR5000 cells. Resazurin assays were performed three times at 37 °C for 72 h.

### PbCl<sub>2</sub>

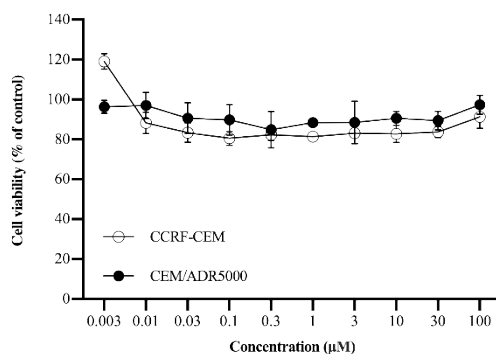

**Fig. S56.** Concentration-response curves of the palladium salt **PbCl<sub>2</sub>** towards CCRF-CEM and CEM/ADR5000 cells. Resazurin assays were performed three times at 37 °C for 72 h.
